# Supplementary material for: Ultra-efficient and stable electro-optic dendrimers containing supramolecular homodimers of semifluorinated dipolar aromatics
Source: Royal Society of Chemistry journal article supplement (doi:10.1039/c8qm00006a), 2018-01-01
Supplement: c8qm00006a1.pdf [file c8qm00006a1.pdf]

*Supporting Information for*

**Ultra-efficient and stable electro-optic dendrimers  
containing supramolecular homodimers of semifluorinated  
dipolar aromatics**

Jieyun Wu, Bo Wu, Wen Wang, Kin Seng Chiang, Alex. K-Y. Jen and Jingdong Luo

1. Synthetic procedures of Dendrimers
2. DSC curves, IR and XRD of dendrimers
3. Dipole moment derivatives

# 1 Synthetic procedures of Dendrimers

## 1.1 General Procedures

All reactions were carried out under inert nitrogen atmosphere unless otherwise specified. Solvents such as tetrahydrofuran (THF) and dichloromethane were treated and distilled prior to use according to the common purification procedures. All the chemicals from Aldrich were used as received unless otherwise specified.  $^1\text{H}$  NMR and  $^{13}\text{C}$  NMR spectra were taken on a Bruker AV-301 spectrometer (300 MHz) and AV-500 spectrometer (125 MHz), respectively. UV/vis spectra were obtained on a Perkin-Elmer Lambda-9 spectrophotometer and ESI-MS spectra were recorded on a Bruker Daltonics Esquire ion trap mass spectrometer. Acceptor and compound 5 were synthesized according to literature procedures.<sup>1, 2</sup>

## 1.2 Synthesis

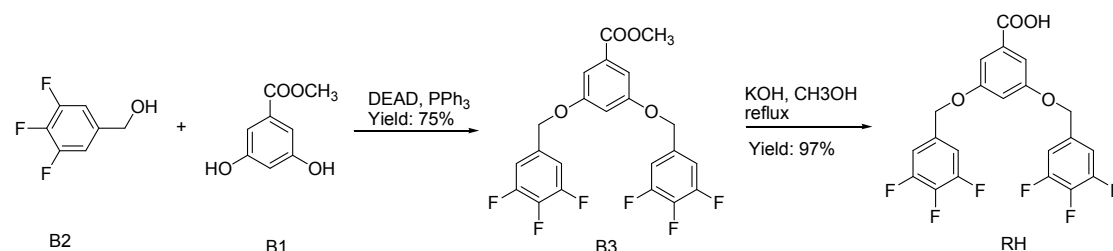

### Compound B3:

To a solution of compound B1 (5.1 g, 30 mmol), compound B2 (4.9 g, 30 mmol) and PPh<sub>3</sub> (10.4 g, 40 mmol) in dry THF (20 mL) was added DEAD (20 mL, 40 mmol) and the mixture solution was allowed to stir at room temperature for 24 h. After roto-evaporation to remove solvent, the crude product was purified by flash chromatography to give compound B3 as white powder.  $^1\text{H}$  NMR (300 MHz, CDCl<sub>3</sub>)  $\delta$  7.16 (d,  $J = 2.2$  Hz, 2H), 7.05 – 6.81 (m, 4H), 6.63 (t,  $J = 2.4$  Hz, 1H), 4.92 (s, 4H), 3.82 (s, 3H).  $^{13}\text{C}$  NMR (126 MHz, CDCl<sub>3</sub>) 166.27, 161.64, 151.32, 140.03, 139.03, 132.37, 111.47, 106.83, 70.93. ESI-MS ( $m/z$ ): Calculated, 456.1; Found, 456.5.

### Compound RH:

To a solution of compound B3 (4.6 g, 10 mmol) in methanol (20 mL) was added KOH (1.1 g, 20 mmol). The reaction mixture was allowed to reflux for 10 h. After roto-evaporation to remove solvent, the crude product was purified by flash chromatography to give compound RH as white powder. <sup>1</sup>H NMR (300 MHz, DMSO) δ 7.52 – 7.27 (m, 4H), 7.19 (s, 2H), 6.95 (s, 1H), 5.15 (s, 4H). <sup>13</sup>C NMR (126 MHz, DMSO) δ 165.67, 158.97, 131.74, 112.07, 111.90, 108.22, 67.77, 52.35. ESI-MS (m/z): Calculated, 442.3; Found, 442.5.

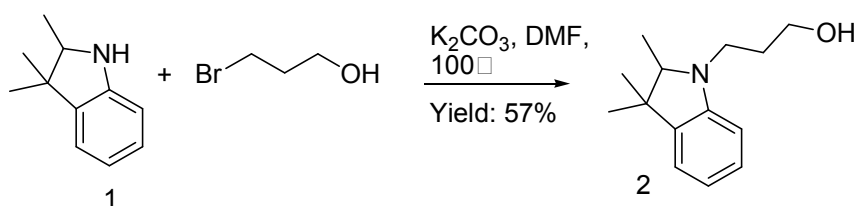

Compound 2:

To a solution of compound 1 (1.61 g, 10 mmol) and  $K_2CO_3$  (2.1 g, 15 mmol) in 20 mL of dry DMF solvent was added 3-bromo-1-propanol (2.0 g, 15 mmol). The mixture solution was allowed to stir overnight at  $100^\circ C$ . Then the solution was washed by brine and extracted by ethyl acetate. The organic layer was dried over  $MgSO_4$ , filtered and evaporated to remove the solvent. The crude product was purified by flash chromatography to give compound 2 as yellow oil. <sup>1</sup>H NMR (300 MHz,  $CDCl_3$ ) δ 7.21 – 7.02 (m, 2H), 6.78 (dd,  $J = 10.7, 4.0$  Hz, 1H), 6.62 (d,  $J = 7.8$  Hz, 1H), 3.80 (t,  $J = 6.0$  Hz, 2H), 3.41 – 3.11 (m, 3H), 2.94 (d,  $J = 32.3$  Hz, 1H), 2.05 – 1.73 (m, 2H), 1.37 – 1.31 (m, 3H), 1.26 (d,  $J = 6.6$  Hz, 3H), 1.09 (s, 3H). <sup>13</sup>C NMR (126 MHz,  $CDCl_3$ ) δ 150.12, 138.40, 126.73, 121.05, 117.47, 106.58, 69.26, 60.82, 43.73, 41.96, 29.30, 25.16, 22.25, 11.87. ESI-MS (m/z): Calculated, 219.16; Found, 219.32.

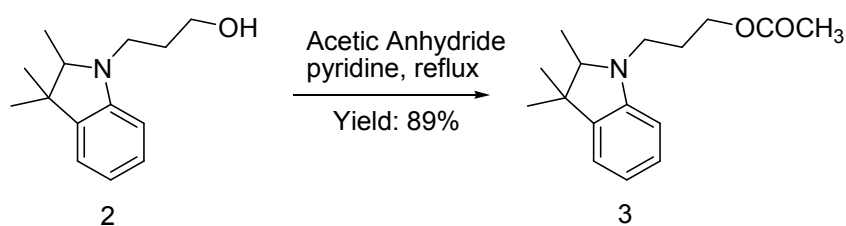

Compound 3:

To a solution of compound 2 (2.2 g, 10 mmol) in acetic anhydride (10 mL) was added a drop of pyridine as catalysis. The solution was allowed to reflux overnight and then evaporated to remove the solvent. The crude product was purified by flash chromatography to give compound 3 as yellow oil.  $^1\text{H}$  NMR (300 MHz,  $\text{CDCl}_3$ )  $\delta$  7.11 (ddd,  $J = 13.8, 10.3, 4.1$  Hz, 2H), 6.75 (t,  $J = 7.3$  Hz, 1H), 6.51 (d,  $J = 7.8$  Hz, 1H), 4.30 – 4.12 (m, 2H), 3.39 – 3.10 (m, 3H), 2.13 (d,  $J = 4.1$  Hz, 3H), 2.03 – 1.82 (m, 2H), 1.34 (s, 3H), 1.22 (d,  $J = 6.5$  Hz, 3H), 1.08 (s, 3H).  $^{13}\text{C}$  NMR (126 MHz,  $\text{CDCl}_3$ )  $\delta$  170.32, 149.85, 138.14, 126.65, 121.02, 117.04, 105.84, 68.62, 61.81, 41.93, 25.64, 25.14, 22.19, 20.27, 11.83.

ESI-MS (m/z): Calculated, 261.1; Found, 261.3

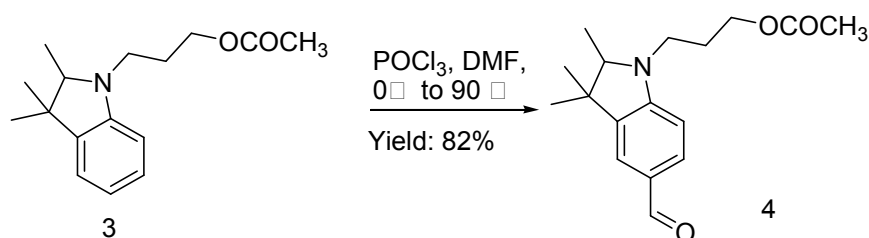

Compound 4:

To dry DMF solution (10 mL) was added  $\text{POCl}_3$  (0.9 g, 6 mmol) at  $0^\circ\text{C}$  and the solution was stirred at  $0^\circ\text{C}$  for 2 h. The solution of compound 3 (1.3 g, 5 mmol) in 5 mL DMF was slowly added into  $\text{POCl}_3$  solution. The mixture solution was allowed to stir at  $90^\circ\text{C}$  for 3 h and quenched in  $\text{NaHCO}_3$  solution. The organic layer was collected, dried, concentrated and purified by flash chromatography to give compound 4 as yellow oil.  $^1\text{H}$  NMR (300 MHz,  $\text{CDCl}_3$ )  $\delta$  9.69 (d,  $J = 2.2$  Hz, 1H), 7.66 – 7.45 (m, 2H), 6.42 (d,  $J = 8.1$  Hz, 1H), 4.23 – 4.05 (m, 2H), 3.56 – 3.17 (m, 3H), 2.15 – 2.05 (m, 3H), 2.00 – 1.84 (m, 2H), 1.29 (d,  $J = 5.9$  Hz, 3H), 1.18 (d,  $J = 6.6$  Hz, 3H), 1.09 (s, 3H).  $^{13}\text{C}$  NMR (126 MHz,  $\text{C}_6\text{D}_6$ )  $\delta$  190.37, 155.46, 139.54, 134.82, 127.43, 122.12, 104.87, 69.23, 62.25, 41.22, 40.11, 26.95, 26.52, 23.14, 21.15, 12.94. ESI-MS (m/z): Calculated, 289.1; Found, 289.5.

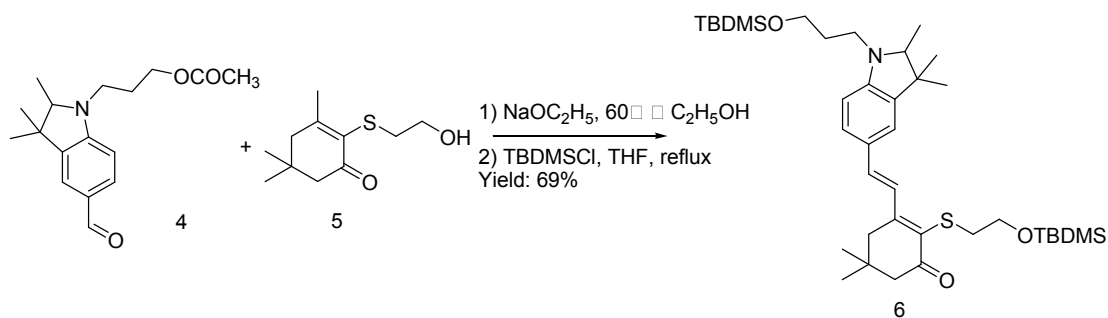

#### Compound 6:

To a solution of compound 4 (1.45 g, 5 mmol) and compound 5 (1.2 g, 6 mmol) in 10 mL dry ethanol was added 10 mmol sodium ethoxide. After stirred overnight at 60 °C and the reacted solution was then poured into DIO water, then extracted with ethyl acetate and concentrated to remove the solvent. Then TBDMSCl (2.4 g, 1.5 mmol) and 20 mL dry THF was added to allow the reflux of solution for 8 h. The mixture solution was concentrated and then purified by flash chromatography to give compound 6 as orange-red oil. <sup>1</sup>H NMR (300 MHz, CDCl<sub>3</sub>) δ 7.87 (t, *J* = 14.9 Hz, 1H), 7.31 – 7.16 (m, 2H), 7.00 (d, *J* = 16.2 Hz, 1H), 6.42 (d, *J* = 8.1 Hz, 1H), 3.67 (dt, *J* = 7.0, 6.5 Hz, 4H), 3.40 – 3.12 (m, 3H), 2.87 (t, *J* = 7.2 Hz, 2H), 2.59 (s, 2H), 2.48 – 2.33 (m, 2H), 1.73 (dd, *J* = 12.8, 6.4 Hz, 3H), 1.29 (s, 3H), 1.14 (t, *J* = 7.1 Hz, 3H), 1.05 (d, *J* = 2.6 Hz, 9H), 0.90 (d, *J* = 2.9 Hz, 9H), 0.84 (s, 9H), 0.11 – -0.04 (m, 12H). <sup>13</sup>C NMR (500 MHz, CDCl<sub>3</sub>) δ 195.45, 157.74, 152.03, 139.42, 137.52, 127.67, 125.80, 120.18, 106.83, 105.61, 62.97, 42.47, 36.42, 32.22, 29.94, 28.86, 27.93, 27.21, 26.86, 26.38, 25.52, 18.26, 13.04, 12.09, -4.77, -5.57. ESI-MS (*m/z*): Calculated, 698.3; Found, 698.7.

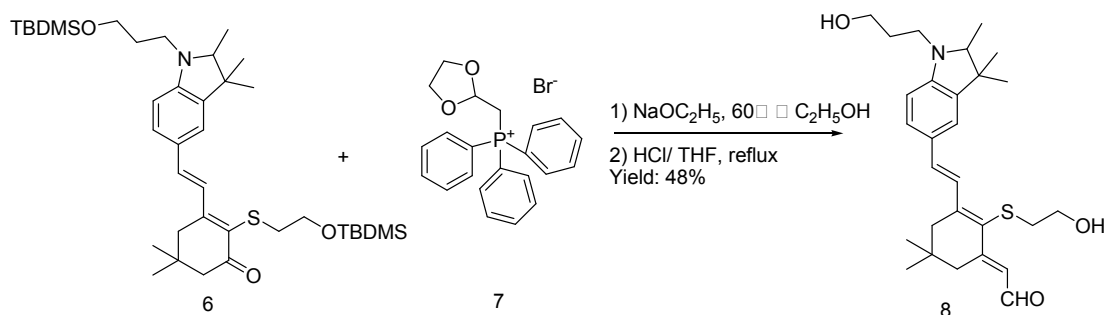

### Compound 8:

To the solution of compound 6 (0.7 g, 1 mmol) and compound 7 (0.5 g, 1.2 mmol) in 10 mL dry ethanol was added 1 mmol sodium ethoxide. The mixture was stirred overnight at 60 °C and concentrated to remove the solvent. Then 10 mL HCl/THF (2 M) was added to allow the reflux of solution for 1 h. The mixture solution was poured into sodium chloride, extracted, concentrated and then purified by flash chromatography to give compound 8 as orange oil. <sup>1</sup>H NMR (300 MHz, CDCl<sub>3</sub>) δ 10.16 (d, *J* = 8.0 Hz, 1H), 7.95 (d, *J* = 16.2 Hz, 1H), 7.28 (s, 1H), 7.23 (d, *J* = 1.6 Hz, 1H), 7.02 (d, *J* = 8.1 Hz, 1H), 6.93 (d, *J* = 16.2 Hz, 1H), 6.51 (d, *J* = 8.2 Hz, 1H), 3.78 (t, *J* = 5.9 Hz, 2H), 3.67 (s, 2H), 3.47 – 3.18 (m, 3H), 2.85 – 2.73 (m, 4H), 2.54 (s, 2H), 1.85 (qd, *J* = 13.2, 7.0 Hz, 3H), 1.33 (s, 3H), 1.21 (d, *J* = 6.6 Hz, 3H), 1.07 (d, *J* = 7.6 Hz, 9H). <sup>13</sup>C NMR (126 MHz, CDCl<sub>3</sub>) δ 191.68, 157.17, 156.88, 151.85, 150.98, 136.19, 128.66, 126.60, 124.03, 120.68, 106.58, 69.47, 61.19, 60.97, 42.56, 41.77, 39.93, 38.19, 30.14, 30.01, 28.32, 26.21, 23.03, 12.60. ESI-MS (*m/z*): Calculated, 469.7; Found, 470.2.

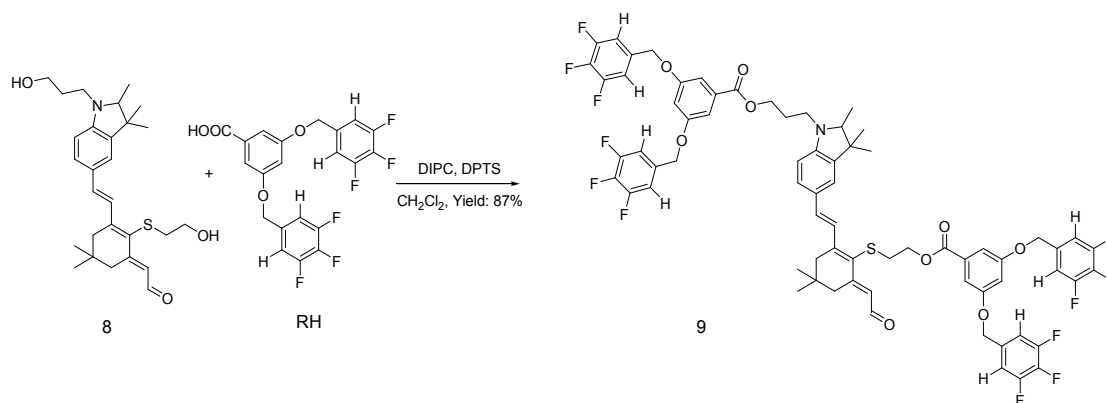

### Compound 9:

To a solution of compound 8 (0.23 g, 0.5 mmol) and RH (0.66 g, 1.5 mmol) in CH<sub>2</sub>Cl<sub>2</sub> (20 mL) was added DIPC (0.18 g, 1.5 mmol) and DPTS (0.025 g, 0.01 mmol). The mixture reaction was allowed to stir overnight at 50 °C. After removal of the solvent, the crude product was purified by flash chromatography to give compound 9 as orange-red powder. <sup>1</sup>H NMR (300 MHz, CDCl<sub>3</sub>) δ 10.12 (t, *J* = 17.1 Hz, 1H), 7.90

(d,  $J = 16.2$  Hz, 1H), 7.25 (dd,  $J = 10.2, 2.3$  Hz, 4H), 7.18 (dd,  $J = 10.0, 8.5$  Hz, 2H), 7.05 (dt,  $J = 12.1, 6.2$  Hz, 8H), 6.87 (d,  $J = 16.1$  Hz, 2H), 6.80 – 6.70 (m, 2H), 6.62 (d,  $J = 2.2$  Hz, 1H), 6.34 (d,  $J = 8.6$  Hz, 1H), 5.08 – 4.94 (m, 8H), 4.40 (t,  $J = 6.0$  Hz, 4H), 3.84 (ddd,  $J = 19.8, 18.7, 11.4$  Hz, 2H), 3.43 – 3.18 (m, 2H), 2.95 (t,  $J = 6.2$  Hz, 2H), 2.75 (s, 2H), 2.47 (s, 2H), 2.18 (s, 2H), 1.93 (d,  $J = 11.9$  Hz, 2H), 1.48 – 1.36 (m, 3H), 1.29 (s, 3H), 1.16 (dd,  $J = 11.0, 6.6$  Hz, 6H), 1.03 (d,  $J = 6.6$  Hz, 6H).  $^{13}\text{C}$  NMR (126 MHz,  $\text{CDCl}_3$ )  $\delta$  193.71, 165.77, 159.21, 153.16, 152.34, 150.36, 140.38, 139.75, 138.36, 132.72, 131.12, 127.31, 123.79, 123.59, 121.71, 111.28, 111.24, 111.15, 111.11, 108.70, 107.15, 105.74, 69.22, 68.55, 63.26, 63.09, 42.61, 42.54, 42.39, 42.20, 41.62, 41.48, 29.72, 26.59, 26.39, 25.67, 23.50, 22.98, 12.66. ESI-MS ( $m/z$ ): Calculated, 1318.3; Found, 1318.9.

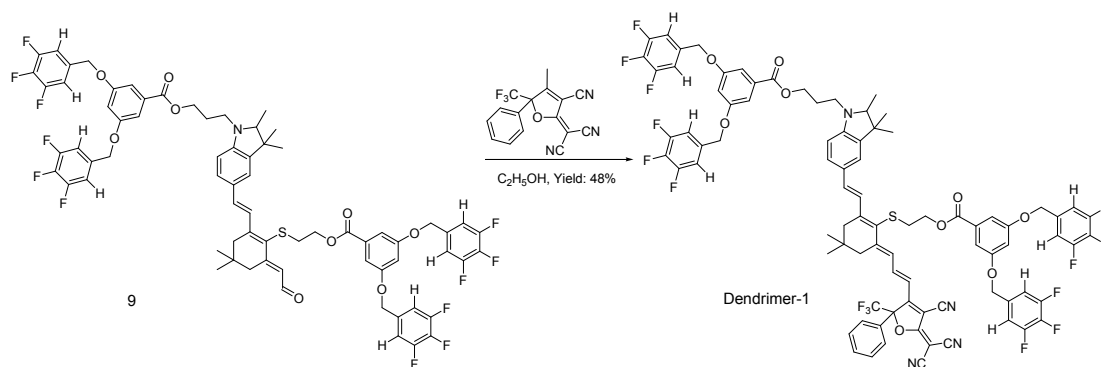

#### Chromophore Dendrimer-1:

To a solution of compound 9 (0.13 g, 0.1 mmol) in ethanol (5 mL) was added acceptor (0.06 g, 0.2 mmol). The mixture solution was allowed to stir at 60 °C for 30 min and concentrated by roto-evaporation. The crude product was purified by flash chromatography to give Dendrimer-1 as dark-green powder.

$^1\text{H}$  NMR (300 MHz,  $\text{CDCl}_3$ )  $\delta$  7.96 (d,  $J = 15.9$  Hz, 1H), 7.65 – 7.49 (m, 8H), 7.42 (d,  $J = 12.7$  Hz, 1H), 7.27 – 7.25 (m, 2H), 7.21 (t,  $J = 5.7$  Hz, 4H), 7.15 – 6.95 (m, 8H), 6.82 – 6.70 (m, 1H), 6.45 (d,  $J = 14.6$  Hz, 1H), 6.33 (d,  $J = 8.1$  Hz, 1H), 5.13 – 4.92 (m, 8H), 4.50 – 4.27 (m, 4H), 3.35 (dd,  $J = 13.5, 6.9$  Hz, 2H), 2.93 (dd,  $J = 15.1, 8.5$  Hz, 2H), 2.50 (s, 2H), 2.28 (dd,  $J = 32.4, 16.8$  Hz, 2H), 2.15 – 1.96 (m, 2H), 1.40 (dd,  $J = 12.5, 10.4$  Hz, 2H), 1.30 (t,  $J = 7.0$  Hz, 3H), 1.20 (t,  $J = 8.4$  Hz, 3H), 1.05 (dd,  $J = 15.3, 8.4$  Hz, 3H), 0.98 (s, 3H), 0.89 (s, 3H).  $^{13}\text{C}$  NMR (126 MHz,  $\text{CDCl}_3$ )  $\delta$  175.29,

162.32, 159.21, 159.13, 157.03, 153.68, 152.42, 150.63, 150.26, 139.82, 132.41, 131.34, 130.04, 129.70, 129.17, 128.22, 126.84, 126.64, 124.17, 117.04, 111.28, 111.10, 110.75, 108.79, 108.68, 107.20, 106.18, 69.12, 68.55, 63.65, 42.59, 41.66, 41.10, 30.38, 26.34, 23.00, 12.68.

ESI-MS (m/z): Calculated, 1615.5; Found, 1615.9.

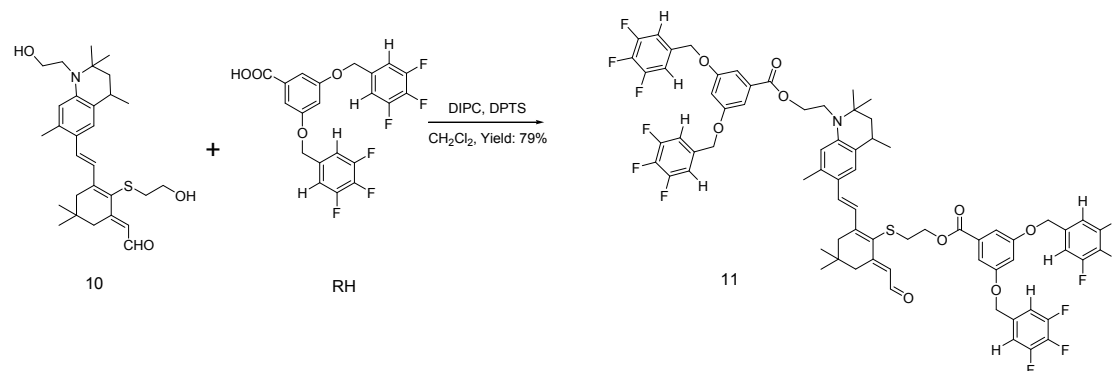

### Compound 11

The synthetic procedure of compound 9 was followed to synthesis compound 11 as orange-red powder. <sup>1</sup>H NMR (500 MHz, CDCl<sub>3</sub>) δ 10.17 – 9.95 (m, 1H), 7.80 (t, *J* = 22.5 Hz, 1H), 7.35 (d, *J* = 25.8 Hz, 1H), 7.23 – 7.07 (m, 4H), 7.05 – 6.86 (m, 10H), 6.67 – 6.57 (m, 2H), 6.53 – 6.45 (m, 1H), 5.08 – 4.74 (m, 8H), 4.48 – 4.15 (m, 4H), 3.64 (ddd, *J* = 14.3, 9.0, 5.6 Hz, 2H), 3.50 – 3.27 (m, 2H), 2.87 (dd, *J* = 13.3, 6.8 Hz, 2H), 2.65 (s, 2H), 2.42 – 2.33 (m, 2H), 2.33 – 2.24 (m, 2H), 1.54 (s, 3H), 1.27 (d, *J* = 10.7 Hz, 6H), 1.09 (d, *J* = 11.0 Hz, 3H), 1.00 – 0.90 (m, 6H). <sup>13</sup>C NMR (126 MHz, CDCl<sub>3</sub>) δ 191.49, 165.77, 159.21, 159.12, 154.17, 153.16, 152.34, 150.36, 140.38, 139.75, 138.36, 132.72, 131.12, 127.31, 123.79, 123.59, 121.71, 111.28, 111.24, 111.15, 111.11, 108.70, 107.15, 105.74, 69.22, 68.55, 63.26, 63.09, 42.61, 42.54, 42.39, 42.20, 41.62, 41.48, 30.06, 29.72, 27.67, 26.59, 26.39, 25.67, 23.50, 22.98, 12.66, 1.05, 0.32. ESI-MS (m/z): Calculated, 1332.3; Found, 1332.5.



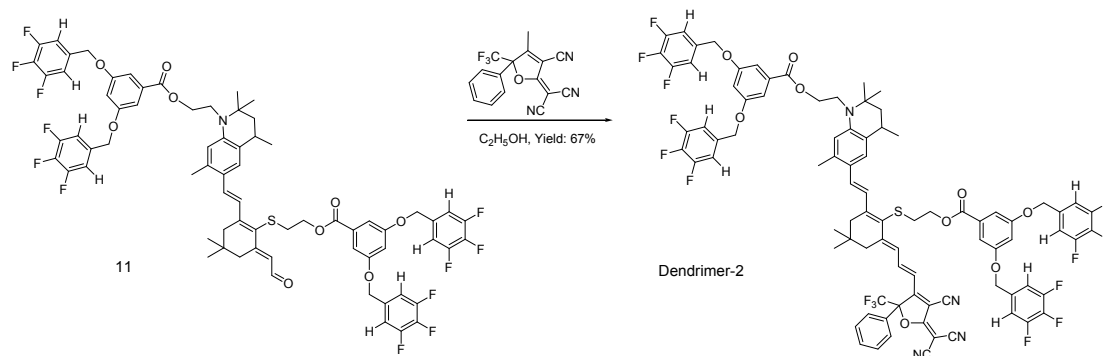

## Chromophore Dendrimer-2

The synthetic procedure of chromophore Dendrimer-1 was followed to synthesis Dendrimer-2 as dark-green powder.  $^1\text{H}$  NMR (300 MHz,  $\text{CDCl}_3$ )  $\delta$  7.92 (d,  $J = 15.8$  Hz, 1H), 7.54 – 7.39 (m, 4H), 7.33 (d,  $J = 12.8$  Hz, 1H), 7.20 (d,  $J = 2.4$  Hz, 3H), 7.14 (s, 1H), 7.09 (d,  $J = 2.3$  Hz, 1H), 7.06 – 6.87 (m, 10H), 6.68 (m, 2H), 6.65 – 6.61 (m, 2H), 6.53 (s, 1H), 6.36 (d,  $J = 14.2$  Hz, 1H), 5.02 – 4.80 (m, 8H), 4.30 (s, 4H), 3.68 (s, 2H), 3.49 (s, 2H), 2.88 (d,  $J = 6.4$  Hz, 2H), 2.42 (s, 2H), 2.32 (s, 2H), 1.51 (s, 6H), 1.33 (d,  $J = 6.5$  Hz, 3H), 1.25 (d,  $J = 6.5$  Hz, 3H), 1.16 (d,  $J = 11.7$  Hz, 3H), 0.98 – 0.89 (m, 2H), 0.82 (s, 3H).  $^{13}\text{C}$  NMR (126 MHz,  $\text{CDCl}_3$ )  $\delta$  166.00, 165.11, 162.32, 159.22, 152.42, 150.47, 135.13, 132.67, 131.81, 131.47, 129.70, 129.29, 126.52, 123.18, 116.97, 111.26, 108.80, 107.15, 106.80, 105.27, 104.99, 68.57, 63.68, 63.05, 54.70, 43.62, 41.45, 29.74, 26.70, 24.54, 21.73, 20.82, 20.21, 18.96.

ESI-MS ( $m/z$ ): Calculated, 1629.5; Found, 1630.4.

## 2. DSC curves of dendrimers

Glass transition temperatures ( $T_g$ ) were measured by differential scanning calorimetry (DSC) using a DSC2010 in TA instruments with a heating rate of 10  $^\circ\text{C}/\text{min}$ .

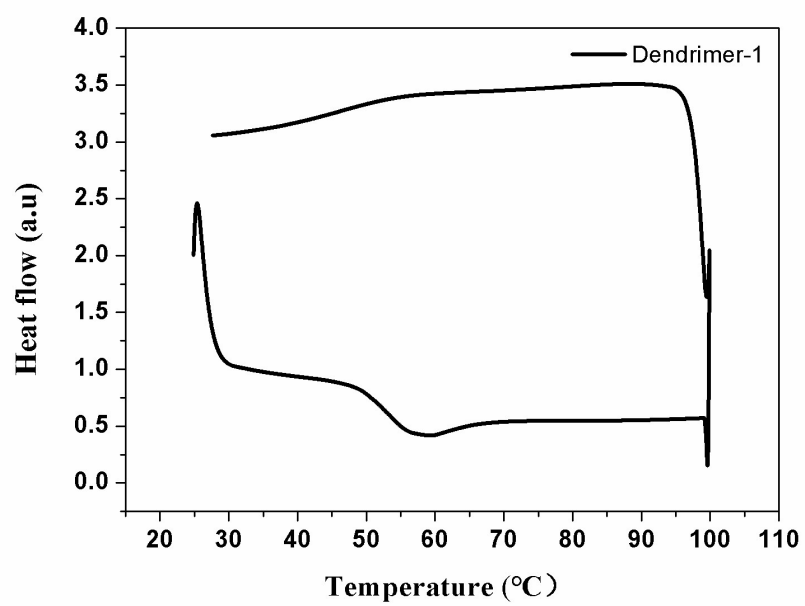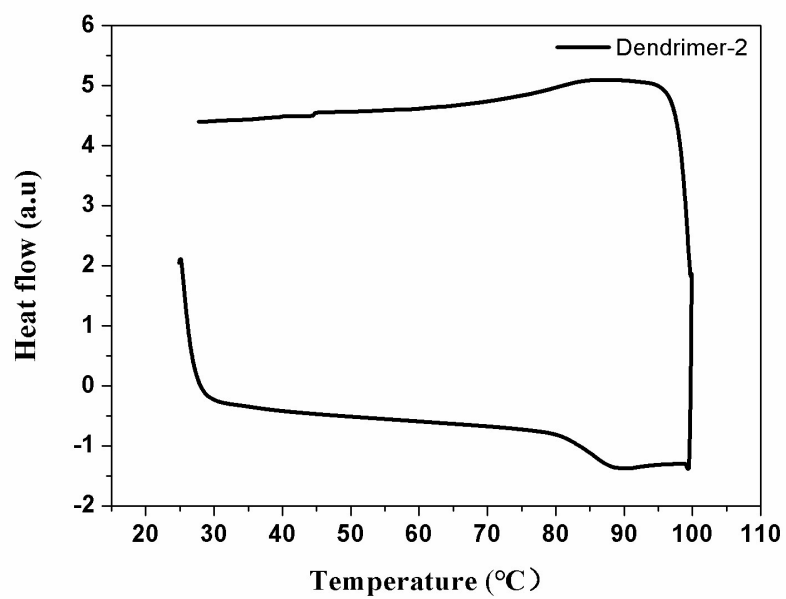

Figure S1. DSC curves of Dendrimer-1 and Dendrimer-2

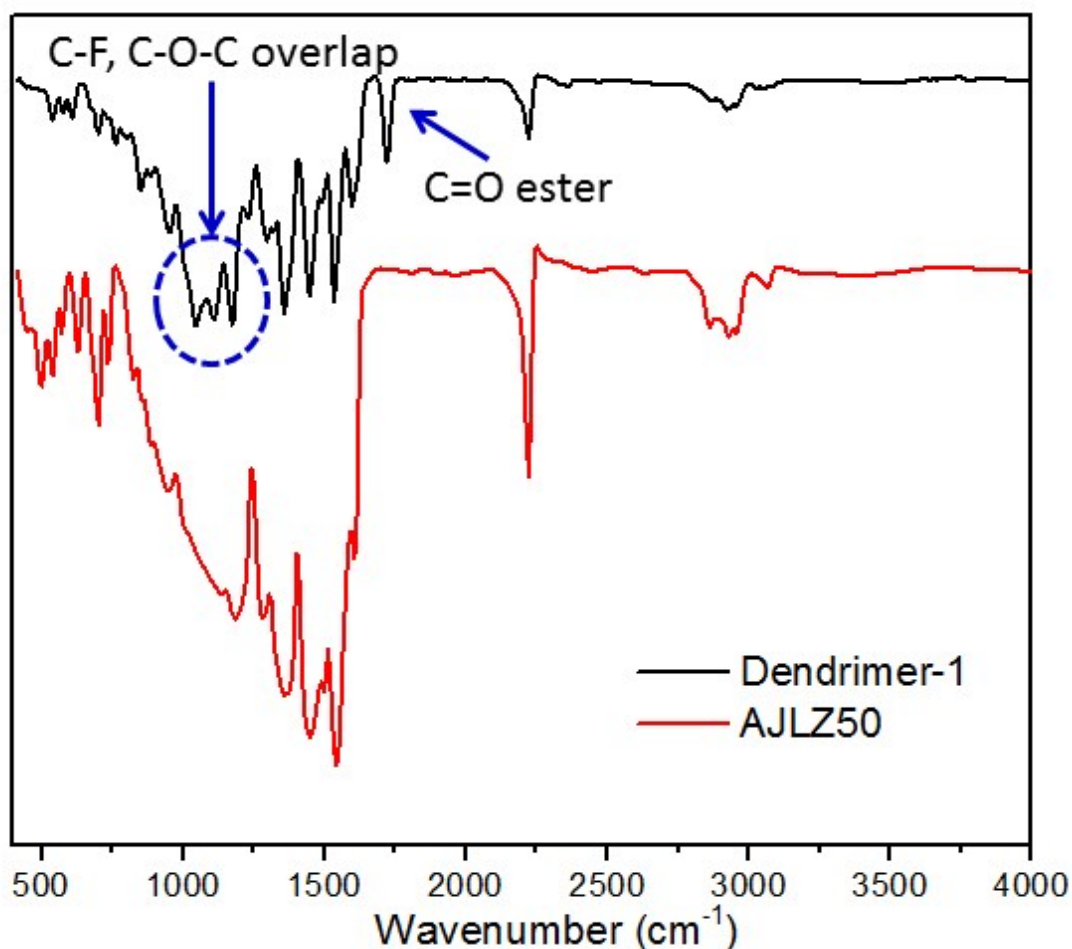

Figure S2. Infrared spectra of Dendrimer-1 and AJLZ50

The IR spectra of dendrimer-1 and AJLZ50 are shown in Figure S2. The absorption peak at  $1740\text{ cm}^{-1}$  belongs to the C=O (ester) due to the introduction of dendritic B4 by esterification. However, the strong absorption of C-F ( $1000\text{--}1250\text{ cm}^{-1}$ ) is overlapped by the strong and broad absorption of C-O-C stretch. This overlap leads to the difficulty of distinguishing the self-assembly interaction of TFB-TFB by the IR absorption change of C-F. In this case, it is hard to observe the interactions of semifluorobenzene homodimerization. The powder XRD spectra of Dendrimer-1 (Figure S3) either cannot characterize the motion of self-assembly.

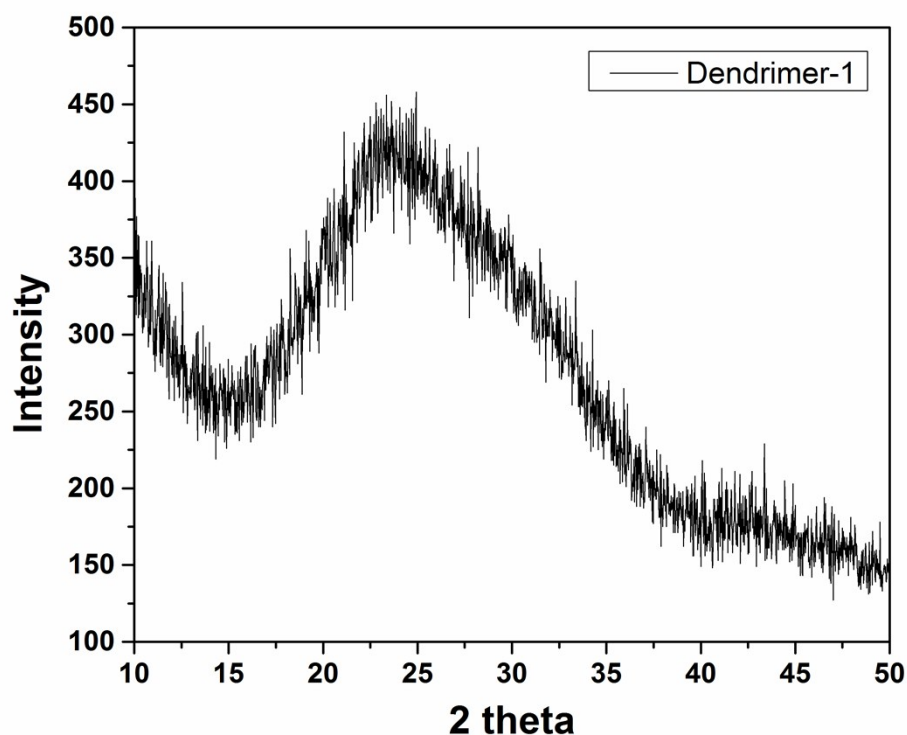

Figure S3. Powder XRD of Dendrimer-1.

### 3. Dipole moment derivatives

DFT calculations using Gaussian 09 were carried out at the hybrid B3LYP level by employing the split valence 6-31 g(d) basis set.<sup>3</sup> The number of calculated dipole moment derivatives for Dendrimer-1, Dendrimer-2 and AJL-50 were 1620, 1647 and 954. The detailed values of dipole moment derivatives (unit of electrons) were listed as followed:

Dipole moment derivatives of Dendrimer-1:

|                 |                 |                 |                 |                 |
|-----------------|-----------------|-----------------|-----------------|-----------------|
| -1.53328011E+00 | 1.08648301E+00  | -7.03240854E-01 | 4.33358053E-01  | -2.76184226E-01 |
| 3.98263562E-02  | 1.17884457E-01  | -2.01989547E-01 | 3.29165621E-02  | 1.23125323E+00  |
| -9.82949472E-01 | 7.19655325E-01  | -2.04406035E+00 | 1.55328162E+00  | -8.93005538E-01 |
| 1.39096510E+00  | -8.75753323E-01 | 5.82232463E-01  | 5.44447451E-02  | -5.33866106E-02 |
| -4.96232551E-02 | 1.03050504E+00  | -7.83878429E-01 | 3.47187242E-01  | -1.34272003E+00 |
| 7.77959157E-01  | -5.57359934E-01 | 1.50670678E+00  | -8.37319479E-01 | 3.41087998E-01  |
| -5.50415237E-01 | 2.87443329E-01  | -2.24897097E-01 | -7.44660896E-02 | -8.92658474E-02 |
| 5.60768465E-02  | -1.52482633E+00 | 8.00483923E-01  | -3.39551904E-01 | 1.47154975E+00  |
| -1.00216402E+00 | 6.09168518E-01  | -7.64418860E-01 | 6.36925665E-01  | -4.43239632E-01 |
| 1.96949433E-02  | -1.05144691E-01 | 4.38280801E-02  | -8.50432323E-01 | 5.31237944E-01  |
| -4.01831546E-01 | 7.62308604E-01  | -5.89965956E-01 | 3.11827037E-01  | 4.89084213E-02  |

4. 94057134E-03 -4. 08277777E-03 -3. 11984099E-04 1. 08392871E-01 4. 23146149E-02  
7. 91395488E-02 -1. 65671010E-02 1. 80213355E-01 -2. 87091510E-01 4. 15272621E-01  
-3. 47244876E-01 -2. 31570760E-01 5. 18905627E-01 -2. 34596633E-01 2. 82422430E-01  
-4. 36394489E-01 7. 75883364E-01 -1. 45175772E-01 7. 23370025E-02 3. 44372437E-02  
5. 72472231E-02 6. 81735626E-02 1. 54183672E-02 4. 19880567E-02 1. 22684159E-02  
6. 67468981E-02 9. 91846854E-02 -2. 13636233E-02 3. 08763068E-02 -5. 49351419E-02  
3. 30887432E-02 7. 59125794E-02 9. 40318904E-02 5. 90259793E-02 -1. 89667636E-02  
-7. 87777309E-03 -1. 72784131E-02 7. 68457192E-02 -2. 75803208E-02 1. 02777242E-01  
-1. 39543141E-02 7. 28874118E-02 -9. 20765664E-03 7. 61780837E-02 -1. 71092043E+00  
8. 05089447E-01 -2. 61686754E-01 2. 63654046E+00 -2. 11654868E+00 1. 13640537E+00  
-9. 16434647E-01 7. 16990003E-01 -8. 59644902E-01 1. 32298793E-01 -1. 48236526E-02  
7. 81473232E-03 -6. 01520216E-02 1. 61726251E-02 3. 38217106E-02 -4. 08705444E-02  
1. 12601992E-01 -1. 13181962E-02 5. 52010828E-02 -1. 44681181E-02 -3. 27647950E-02  
-2. 12960830E-02 -2. 13469721E-02 -5. 24565132E-02 2. 13356190E-03 -1. 14040663E-01  
-1. 69642369E-02 2. 35327237E-02 -5. 69177950E-02 1. 29942374E-01 4. 29822442E-02  
1. 08313190E-02 2. 99507262E-02 2. 17796521E-02 8. 03931512E-02 -8. 19734762E-02  
-1. 70392993E-01 7. 84317660E-02 -8. 02060177E-02 3. 19609343E-02 1. 39101658E-02  
9. 69627946E-03 -4. 74255871E-02 -1. 58917759E-02 8. 41793730E-02 2. 47779493E-02  
-1. 39829961E-03 -2. 33399203E-03 -1. 78400816E-02 5. 99515095E-02 -4. 36093062E-02  
-7. 46535688E-02 6. 43484223E-02 -4. 83320450E-02 -8. 28534442E-02 1. 25448555E-02  
-5. 09440714E-02 6. 51429271E-02 3. 58811536E-02 2. 11240181E-02 -3. 88725910E-02  
-3. 61469902E-03 4. 98404956E-02 8. 46930246E-02 -6. 55785430E-02 4. 13672944E-02  
1. 23032855E-02 -1. 25913702E-01 1. 31097908E-01 -2. 11517610E-03 1. 14729193E-01  
-6. 12739516E-02 -1. 20320132E-05 7. 38896277E-02 4. 70420777E-02 -2. 05915178E-02  
2. 91993165E-02 -8. 58196150E-02 4. 76938366E-02 -6. 22932888E-02 -5. 14887204E-02  
5. 02740066E-02 6. 80760512E-03 2. 68255540E-02 7. 03943076E-02 -1. 22591702E-02  
3. 80803264E-02 2. 00394549E-02 -3. 48024761E-02 8. 21519384E-02 -1. 47041406E-02  
-6. 96049007E-02 -5. 24801201E-02 -5. 37762236E-02 -6. 33895192E-02 -7. 39328821E-02  
1. 33557703E-02 -6. 48396795E-02 3. 06119666E-02 6. 92255820E-02 -1. 11279865E-02  
1. 85857050E-02 6. 29388991E-03 -5. 32352043E-02 1. 26601303E-01 -2. 37112638E-02  
1. 26382642E-01 -1. 16423851E-01 -8. 85640970E-02 3. 76784012E-02 -7. 83402313E-03  
3. 82043535E-02 5. 93589334E-02 -2. 03539271E-02 -4. 59221639E-02 3. 87165805E-03  
3. 94143321E-02 6. 24221269E-02 -1. 26227523E-01 -1. 13065542E-02 -8. 39600546E-02  
-6. 67789223E-02 -1. 19898105E-01 -2. 44551255E-01 1. 35294813E-01 -2. 56584922E-01  
1. 48172061E+00 -6. 14565123E-01 2. 11883729E-01 -3. 80559256E-01 3. 56507717E-01  
2. 23264576E-02 -2. 76918534E-01 1. 67459415E-01 1. 46905226E-01 -1. 03314167E-01  
9. 18619355E-02 -6. 42854085E-02 -1. 37623413E-01 1. 44826942E-01 -7. 69843228E-02  
3. 09586162E-03 -1. 05131316E-03 5. 01610929E-02 -8. 83738537E-02 5. 29330892E-02  
-1. 33949883E-02 -1. 74883301E-01 -3. 77369517E-02 8. 14958887E-03 7. 81839635E-02  
1. 44874693E-02 4. 79254103E-02 -1. 84678552E-01 1. 53760482E-01 -8. 65984830E-02  
1. 03738994E-01 6. 12047480E-03 1. 37486085E-02 -1. 28429119E-01 3. 94925453E-02  
1. 45166031E-01 6. 96144572E-01 4. 60965338E-02 -1. 25133494E-01 5. 16908565E-01  
5. 48278384E-01 -2. 92916172E-01 -3. 58577300E-01 -2. 68914178E-01 5. 82286815E-01  
8. 56747725E-03 -1. 02706598E-02 -4. 51741210E-02 1. 66669167E-02 6. 47105251E-02

-1. 53694681E-02 -8. 47812554E-02 -1. 38348525E-03 -7. 29543609E-02 1. 25450051E-04  
-4. 87780378E-02 5. 43975880E-02 -1. 18605977E-03 -1. 04969399E-01 5. 40762349E-02  
3. 62652562E-02 9. 10057545E-02 -8. 87191529E-03 -1. 09968726E-01 9. 25024538E-02  
3. 04700879E-02 -3. 43784083E-02 -1. 01030416E-01 1. 40602344E-02 1. 50274196E-01  
-6. 69023326E-02 -3. 13122828E-02 -1. 64008354E-02 -1. 04434344E-02 -5. 26054670E-02  
-1. 33223241E-01 8. 97171200E-04 2. 32584191E-03 -6. 48386991E-03 3. 34863113E-02  
-9. 44337058E-02 -1. 82623698E+00 -3. 28668677E-01 5. 50766527E-01 -5. 56118072E-01 -  
7. 42134530E-01 5. 15015115E-01 7. 53507293E-01 4. 30204509E-01 -7. 28536686E-01  
2. 37086982E+00 1. 69647093E-01 -4. 71611109E-01 2. 63898068E-01 1. 12998181E+00  
-8. 24245605E-01 -4. 21339972E-01 -7. 63072233E-01 1. 03346827E+00 -1. 17307209E+00  
1. 68298722E-01 -9. 52842931E-03 2. 01897024E-01 -7. 33458693E-01 3. 46898482E-01  
-8. 63529628E-02 3. 43773747E-01 -6. 22875001E-01 4. 11628749E-01 -8. 12129713E-02  
7. 73787205E-02 -1. 63881876E-01 -2. 12538423E-01 2. 26619404E-01 1. 40968815E-01  
2. 04502804E-01 -1. 86779028E-01 -3. 49226498E-01 -3. 90069561E-02 3. 66270395E-02  
4. 30647937E-01 -2. 42304791E-01 5. 86662338E-02 -3. 12711061E-01 8. 12377277E-02  
-2. 22200519E-01 -4. 60239514E-01 5. 36649521E-02 -2. 49767347E-02 -4. 58041541E-01  
-1. 95516564E-01 6. 86422112E-02 4. 18098174E-01 4. 10997874E-02 -2. 07900821E-01  
1. 38616086E+00 -6. 25795381E-01 5. 39890581E-01 -6. 70174322E-01 4. 99293860E-01  
-3. 16376599E-01 5. 92052324E-01 -3. 09250892E-01 4. 22483462E-01 -5. 56661556E-03  
-3. 09693793E-02 2. 39969227E-02 -4. 68565593E-02 1. 07162532E-01 6. 61943775E-03  
-4. 41024468E-02 1. 63647782E-02 1. 15791963E-01 2. 09457948E+00 4. 80557924E-01  
-5. 46353590E-01 7. 23573364E-01 3. 26576165E-01 -1. 96452616E-01 -6. 31591623E-01  
-1. 56547477E-01 3. 26507394E-01 5. 68126495E-02 2. 21183070E-02 -1. 97954531E-02  
5. 73259541E-02 1. 14609629E-01 6. 20169469E-03 -5. 25428873E-02 8. 96878829E-03  
1. 18631203E-01 -6. 73452922E-01 4. 09551813E-02 -5. 92669134E-03 2. 21143563E-02  
-1. 72215091E-01 -2. 36612966E-02 -2. 76566863E-03 -3. 59385872E-02 -1. 74621155E-01  
1. 65840734E-01 -1. 56391139E-02 7. 46478728E-03 -3. 57138663E-02 2. 16106363E-02  
9. 74800288E-02 1. 84721346E-02 9. 38147260E-02 3. 47878900E-02 -2. 20723105E+00  
-5. 21461550E-01 5. 96862438E-01 -8. 73877616E-01 -5. 50170754E-01 3. 56434240E-01  
8. 93803437E-01 3. 14083686E-01 -6. 26479989E-01 -1. 48245022E+00 6. 12871393E-01  
-5. 14689141E-01 7. 96833282E-01 -8. 34717434E-01 5. 16494785E-01 -5. 93279460E-01  
4. 78859906E-01 -6. 67217746E-01 7. 76645490E-01 1. 22254491E-01 -1. 46936693E-01  
6. 76781526E-01 5. 71786868E-01 -2. 58652250E-01 -8. 26585443E-01 -2. 27482517E-01  
6. 84622568E-01 -1. 31548098E-01 -2. 80535163E-02 -6. 57983776E-02 -1. 83234860E-01  
-2. 49795946E-02 -8. 10926843E-03 8. 36239783E-02 8. 40197009E-03 -1. 15007975E-01  
-3. 07096367E-02 5. 52748788E-02 2. 19818230E-02 -3. 29284998E-02 -1. 24372168E-01  
3. 97548839E-03 1. 25551671E-01 -1. 01092619E-02 -2. 77577488E-02 6. 16392942E-01  
-7. 99617216E-02 3. 83216851E-02 -5. 20473908E-01 7. 52933807E-01 -3. 34045178E-01  
3. 41913683E-01 -2. 96120406E-01 6. 14831647E-01 -1. 84530984E-02 5. 47684677E-03  
6. 50084535E-02 1. 06915585E-01 -3. 72288147E-02 -7. 73735459E-03 1. 92006999E-02  
7. 70514640E-03 -1. 23705719E-01 -9. 64797957E-02 -6. 73311417E-02 -1. 00114550E-02  
5. 08149517E-02 -1. 01965540E-01 1. 73974813E-02 -1. 66774937E-01 -9. 82067776E-03  
-3. 74530007E-02 2. 81282601E-01 3. 20988674E-02 -3. 93730176E-02 3. 15576060E-02  
8. 68065285E-02 -1. 81062639E-02 7. 48263681E-02 -1. 23149837E-02 -4. 73873742E-02

-3. 51623095E-01 8. 89100999E-02 1. 49085531E-02 -8. 04943472E-03 -9. 65465704E-02  
-3. 59183730E-03 -2. 74388061E-02 -5. 12991612E-02 -1. 27310030E-01 -3. 08336749E-01  
-1. 59040026E-01 5. 72678529E-02 -9. 97468457E-03 -8. 05138961E-02 -2. 30392103E-02  
5. 30326898E-02 1. 08018672E-02 -1. 70839882E-01 8. 18708394E-01 -4. 49620173E-01  
-7. 52447072E-03 -7. 48690562E-01 8. 53393982E-01 -5. 23785524E-02 8. 11097748E-02  
-1. 12164992E-01 1. 44766653E-01 4. 78236255E-01 3. 09653744E-01 -1. 26649756E-01  
6. 51910328E-01 1. 06559674E+00 -3. 16909962E-01 -2. 16938226E-01 -2. 61775643E-01  
2. 25968178E-01 1. 41606189E+00 1. 43794822E-01 -2. 42474499E-01 1. 40003565E-01  
-6. 71194513E-02 1. 11731374E-02 -2. 40891933E-01 1. 08330526E-02 9. 78752024E-02  
1. 65779037E-01 -5. 60039832E-02 3. 96125750E-02 -6. 25394101E-02 -1. 92744052E-02  
1. 47102895E-02 6. 37122297E-03 7. 87199658E-03 1. 00993025E-01 -2. 03884309E-01  
9. 29728667E-03 -1. 71656694E-01 4. 12044894E-02 -1. 55908663E-01 7. 86151395E-02  
2. 98242828E-02 1. 35056316E-03 -9. 00977701E-02 -3. 71628494E-01 5. 22719443E-02  
8. 44898331E-02 -2. 49157782E-02 -1. 30783493E-01 -2. 87314960E-02 4. 15225940E-02  
2. 05676269E-02 -8. 93013166E-02 3. 03998302E-01 -4. 37040101E-02 3. 30695501E-01  
-3. 11791374E-02 1. 43653930E-01 -5. 29259592E-02 2. 81275691E-01 -8. 94440011E-02  
1. 20322313E+00 9. 51389292E-01 -1. 93436724E-01 -4. 30359596E-01 -3. 15034018E-01  
1. 80899293E-01 1. 82186323E-01 -1. 03043491E+00 2. 31034025E-01 8. 32056377E-01  
1. 21395636E+00 -3. 13625582E-01 8. 42926208E-02 -3. 67712736E-01 1. 65592539E-01 -  
4. 06098237E-02 2. 41318546E-01 -6. 41405105E-02 -6. 13732107E-02 2. 96384293E+00 -  
1. 73672179E+00 8. 78722480E-01 -1. 49390160E+00 9. 63982540E-01 -6. 51010626E-01  
5. 49763657E-01 -4. 87837940E-01 2. 98592742E-01 -3. 00677419E+00 1. 71779427E+00  
-8. 84186619E-01 1. 29417533E+00 -9. 48265908E-01 4. 25809152E-01 -2. 46901698E-01  
1. 29037571E-01 -2. 36238842E-01 5. 82549241E-02 -4. 07474037E-02 3. 08392497E-02  
-5. 89727653E-02 7. 70406193E-02 1. 33105865E-02 -6. 88502156E-02 1. 22064702E-01  
-1. 41339506E-02 7. 66819390E-02 6. 10975966E-03 4. 73046619E-02 -2. 18384609E-02  
5. 97352871E-03 6. 91264840E-02 -7. 73717389E-02 1. 43760809E-01 5. 19707732E-03  
3. 36661841E+00 -1. 70559717E+00 7. 48751913E-01 -1. 16097613E+00 7. 30782534E-01 -  
4. 97838864E-01 6. 64353424E-01 -3. 48464289E-01 2. 85240893E-01 -3. 10643819E+00  
1. 89701711E+00 -7. 55973309E-01 1. 35791969E+00 -5. 73357867E-01 2. 00216938E-01  
-3. 84138112E-01 3. 31400333E-02 -2. 57855008E-01 -2. 22598669E-02 -7. 16225747E-02  
3. 69682498E-02 -3. 73766253E-02 3. 51741206E-02 7. 41617529E-02 -2. 33844224E-01  
1. 28694256E-01 5. 56269923E-02 3. 35893431E+00 -2. 00777696E+00 6. 47832959E-01  
-1. 18747328E+00 8. 88088154E-01 -4. 26825331E-01 6. 75642296E-01 -3. 89460524E-01  
2. 01618480E-01 8. 57468149E-02 3. 68312192E-02 -3. 27426570E-02 2. 62105430E-02  
1. 02822975E-01 -4. 66863166E-04 -1. 02004047E-01 -3. 93002092E-02 1. 56985266E-01  
7. 12837477E-03 2. 15719647E-02 2. 79588353E-02 1. 21602072E-01 -2. 71498086E-02  
-3. 53495374E-02 1. 25296680E-01 -1. 98224211E-02 7. 93560822E-03 -4. 28218580E-02  
5. 42473818E-02 6. 56970060E-03 -6. 36202426E-02 -5. 98764148E-03 5. 19325587E-02 -  
6. 87776596E-02 7. 35423794E-02 7. 10372652E-02 -7. 05205020E-02 -2. 95580324E-02  
-2. 29055207E-02 -8. 54512712E-02 -3. 36699527E-02 -4. 46570274E-02 3. 00737104E-02 -  
6. 27224773E-02 -6. 48966777E-02 -1. 08012821E-01 -8. 07085764E-04 -5. 89440321E-02  
-1. 06264318E-01 -5. 07724407E-02 -2. 39855007E-02 6. 18104587E-04 -3. 01840141E-02  
-5. 35020724E-02 -1. 89448475E-02 5. 10416633E-02 -4. 26919631E-02 1. 88411844E-02

-3. 21023013E-02 4. 69455560E-02 -2. 64674436E-02 8. 17019548E-02 -9. 77788790E-03  
-3. 42755740E+00 1. 86795451E+00 -6. 27327752E-01 1. 65102797E+00 -1. 00730955E+00  
3. 14918380E-01 -6. 69514816E-01 3. 23054332E-01 -2. 59020368E-01 3. 64949018E+00  
-1. 94049314E+00 6. 32060057E-01 -1. 64643598E+00 9. 79578311E-01 -3. 40242081E-01  
6. 52337879E-01 -4. 22099438E-01 1. 29017030E-01 1. 43620312E-03 -8. 04925022E-02  
2. 99337397E-02 4. 41495839E-03 2. 77135375E-02 4. 44975047E-02 -2. 20334737E-02  
5. 44414417E-02 7. 66106230E-02 8. 92322036E-02 -9. 94537578E-02 1. 85291013E-02  
4. 29049320E-04 -2. 77263116E-05 6. 15794827E-02 2. 14475181E-02 5. 54660933E-02  
7. 69530279E-02 -3. 72173884E+00 1. 95635502E+00 -6. 29187988E-01 1. 65196455E+00  
-9. 08169688E-01 2. 17797048E-01 -7. 15634544E-01 2. 91475020E-01 -2. 28501553E-01  
1. 74932886E-02 4. 24823131E-03 -6. 88280050E-04 5. 17956751E-02 -4. 37619473E-02  
6. 58067398E-02 1. 80422390E-02 6. 16519012E-02 8. 39069368E-02 3. 86580628E+00  
-2. 01283763E+00 5. 79111393E-01 -1. 85294623E+00 1. 03052549E+00 -3. 18385194E-01  
6. 66193640E-01 -4. 35250377E-01 1. 14294810E-01 5. 07358023E-01 3. 68289341E-01  
1. 26569226E-01 -2. 31156248E-01 5. 76116907E-01 4. 95589790E-02 1. 93127437E-01  
1. 54250900E-01 2. 38420936E-01 -3. 01948549E+00 1. 61318460E+00 -5. 20131669E-01  
8. 60376091E-01 -6. 87620096E-01 1. 79361672E-01 -2. 21187437E-01 1. 90870544E-01  
-1. 15282482E-01 -1. 17573071E+00 -4. 65703801E-01 2. 90931964E-02 1. 29266073E-01  
-8. 81067967E-01 1. 84692508E-01 -4. 08798180E-02 2. 53373259E-01 -3. 96549913E-01  
2. 74387897E+00 -8. 30122769E-01 3. 03298860E-01 -1. 88948621E+00 1. 72865238E+00  
-4. 87321398E-01 7. 76984064E-01 -7. 43100517E-01 4. 28206573E-01 -1. 59949604E+00  
6. 46640269E-01 -2. 41982429E-01 8. 43879438E-01 -4. 43325229E-01 1. 05698715E-01  
-2. 88030426E-01 1. 33022198E-01 -9. 85430444E-02 7. 57987958E-01 -6. 80952919E-02  
-6. 74669284E-03 5. 85280832E-01 -6. 20753689E-02 8. 72738651E-02 -3. 35982778E-01  
1. 34443662E-01 1. 30745782E-01 -7. 18254184E-01 1. 31639614E-01 -4. 22550959E-02  
-2. 20494011E-01 -1. 91032650E-01 -5. 21605859E-02 1. 44510591E-01 -7. 38844087E-02  
-2. 75760179E-01 1. 36887798E-01 -1. 56270787E-01 8. 78135491E-02 -7. 49717045E-01  
6. 04272852E-01 -1. 65008819E-01 3. 83366252E-01 -2. 07086175E-01 2. 48478618E-01  
-4. 11009781E-01 9. 98172619E-02 -4. 82673510E-02 5. 08033065E-01 -5. 71922454E-01  
9. 31443664E-02 -2. 49216275E-01 1. 19646640E-01 -3. 55010304E-01 4. 41299290E-01  
-5. 21888539E-02 -7. 69622841E-04 7. 46686868E-01 -1. 25382150E-01 1. 00299620E-01  
-4. 34223964E-01 1. 89336653E-01 1. 11497705E-01 -3. 92940438E-01 7. 23335256E-02  
-2. 57847973E-02 -4. 45708737E-01 -1. 12583143E-01 -7. 49066652E-02 2. 54904697E-01  
-1. 11425708E-01 -2. 43947690E-01 9. 07206990E-01 1. 49809412E-01 5. 52657885E-02  
-1. 46177349E-01 1. 46964921E+00 8. 63051216E-02 4. 47088182E-01 -3. 66162829E-01  
1. 62616898E+00 -6. 29296261E-02 1. 23642021E-01 3. 96853756E-02 7. 55120173E-03  
-1. 25452164E-01 -1. 84705914E-02 -6. 21655557E-02 9. 23440296E-02 -9. 61945562E-02  
-8. 48458227E-02 6. 92723637E-02 3. 33651262E-02 2. 12978381E-02 -9. 23176965E-02  
6. 15385974E-02 -4. 79964543E-03 -1. 32549528E-01 6. 19364523E-02 -4. 17183493E-02  
2. 81124550E-02 -6. 46319284E-02 2. 63745639E-02 -7. 22523613E-02 -6. 88221545E-02  
4. 49136107E-02 1. 86810725E-02 -4. 38843844E-02 2. 90407991E-02 9. 66109711E-02  
-8. 84518520E-02 9. 05346829E-02 -2. 57259665E-02 -7. 70453617E-02 -6. 22384858E-02  
-9. 16068122E-02 -5. 04208806E-02 7. 83658853E-02 1. 53844318E-02 3. 35922914E-02  
-6. 70382036E-03 1. 22776222E-01 -1. 49588706E-02 2. 11584809E-02 -1. 10825997E-02



-1. 46943900E-02 -6. 79332469E-02 -3. 35116086E-02 -3. 11848211E-02 -4. 89839371E-03  
-1. 03125941E-01 3. 72178206E-02 -9. 55469763E-02 7. 46005890E-02 1. 38813729E-01  
2. 12789226E-02 -6. 79120718E-02 4. 30370874E-02 -7. 81635299E-02 6. 91211853E-02  
3. 21920055E-02 -1. 92902367E-02 9. 52994968E-02 5. 05851760E-02 4. 77826925E-03  
7. 66585960E-02 4. 60207148E-02 8. 76035445E-02 1. 38549622E-02 6. 98365915E-02  
4. 17256891E-02 7. 16457494E-02 1. 68424932E-02 1. 72193005E-02 -1. 12642388E-01  
5. 57182508E-02 -6. 57340050E-02 2. 59296284E-02 2. 86477108E-02 4. 86417315E-02  
3. 50768474E-02 2. 43007352E-02 6. 44766374E-02 -2. 22630657E-02 2. 57284222E-02  
-2. 19037050E-02 7. 48580600E-02 -1. 38255263E-02 3. 17703611E-02 -5. 03317833E-02  
-7. 78389239E-02 4. 48962828E-02 -1. 00162282E-01 -4. 09215809E-02 -5. 65568988E-02  
-4. 60723391E-04 -5. 59841234E-02 -3. 37354938E-02 -7. 33026485E-02 2. 49590380E-02  
-2. 98551752E-01 -2. 39843197E-01 -1. 25732455E-01 -1. 47116728E-01 -5. 29879931E-01  
-2. 18346903E-01 -2. 40169640E-01 -1. 52852392E-01 -5. 54718033E-01 -1. 69622044E-01  
-5. 25001246E-02 -1. 93032501E-02 1. 17341699E-01 -7. 13275523E-01 2. 08037182E-01  
-1. 77072084E-01 4. 53174026E-01 -6. 38166287E-01 -5. 61032030E-01 1. 12542015E-01  
-3. 98429802E-03 1. 76224882E-01 -3. 53958311E-01 -4. 72257499E-02 1. 63418862E-02  
3. 21426032E-02 -4. 19151042E-01 9. 48039031E-02 -2. 11613346E-02 -5. 25372923E-03  
-5. 01559057E-02 2. 70153754E-02 -2. 96612460E-02 -5. 14586400E-02 -7. 95096641E-03  
1. 44726731E-02 -1. 75122553E-02 -8. 16064649E-02 9. 03206994E-03 -8. 35181584E-02  
-1. 01993291E-01 2. 67964318E-02 -5. 27851525E-03 3. 77955683E-02 5. 65326687E-02  
-5. 28071194E-02 3. 33154504E-02 9. 40182221E-02 6. 75076459E-02 3. 58771267E-02  
-3. 66561482E-02 6. 37832557E-02 -2. 50077129E-02 -1. 54000780E-02 6. 09937464E-03  
5. 03645807E-02 -8. 49019568E-02 4. 96409773E-02 -5. 76504338E-03 7. 15829295E-02  
-3. 47546148E-02 3. 26647544E-02 -2. 96725587E-02 1. 09814460E-01 -4. 09244199E-02  
8. 18256540E-03 -1. 76937280E-03 6. 13303060E-02 4. 78274348E-03 2. 65760121E-02  
3. 83615517E-02 6. 11954900E-02 3. 20649587E-02 -2. 92782982E-02 -2. 47846111E-02  
-2. 55589371E-02 -4. 03185739E-02 -5. 74496332E-02 -3. 82742375E-02 -1. 11782183E-01  
-7. 76648597E-02 -1. 00766651E-02 7. 54493729E-02 -7. 79876019E-02 -7. 25447188E-03  
-2. 60581942E-02 7. 19114166E-02 -2. 93103133E-02 7. 68720580E-02 -2. 26824115E-02  
-9. 71366417E-02 -8. 28419989E-03 7. 91410420E-02 6. 15692173E-03 3. 81721830E-02  
-1. 29514184E-02 5. 71279324E-02 8. 64087543E-04 1. 36117568E-02 7. 62542511E-03  
-3. 68493446E-02 -1. 98781759E-02 6. 28975166E-02 -2. 70576716E-01 6. 63821835E-02  
-1. 33457947E-01 1. 03882944E-01 1. 26445994E-02 -3. 76013207E-02 -3. 24652231E-02  
6. 26192209E-02 -5. 61885083E-03 2. 38122846E-01 1. 59490371E-01 1. 07676652E-01  
2. 38933172E-01 8. 44920808E-02 3. 24849750E-01 2. 04598364E-01 6. 24644118E-02  
1. 95222834E-01 1. 14628429E+00 3. 61906389E-01 5. 34117997E-02 3. 57419740E-01  
4. 40424755E-01 1. 82882528E-02 -3. 40402146E-03 -4. 82488090E-02 4. 26721577E-03  
-2. 38182159E-02 -1. 54609062E-02 -3. 93556786E-02 -3. 20245124E-02 -7. 61206843E-02  
-2. 28847267E-02 2. 25175547E-02 4. 68335666E-02 9. 97693402E-03 -1. 95352278E-02  
-4. 48994369E-02 3. 18731432E-02 -2. 92968845E-02 -6. 71551369E-03 -5. 39346160E-02  
1. 31692261E-02 3. 23742562E-02 6. 50586475E-04 -5. 25095574E-02 -3. 79194841E-02  
-1. 33023041E-02 -8. 86584142E-02 7. 02641287E-04 7. 94409788E-04 2. 17822065E-02  
-5. 47856955E-02 6. 33431735E-04 -5. 64805627E-02 4. 96695479E-03 -5. 16002105E-02  
-7. 17059915E-02 -5. 93212495E-02 -3. 65221300E-01 -6. 15355466E-01 -8. 53151083E-02

-5. 49119947E-01 -2. 30575724E+00 -6. 26746918E-01 1. 25133278E-02 -3. 04493222E-01  
-5. 68782290E-01 4. 84946760E-01 6. 74231285E-01 -8. 59983907E-02 5. 08115684E-01  
2. 45151695E+00 8. 07135391E-01 -2. 69461287E-01 2. 03762058E-01 1. 33518938E+00  
-3. 91006906E-01 -2. 27113876E-01 1. 46370527E-01 -1. 52709145E-01 -9. 19480693E-01  
-2. 33535609E-01 2. 07497388E-01 -2. 19192002E-02 -9. 79562471E-01 7. 73384245E-02  
9. 68330577E-02 -1. 06261089E-01 9. 89836852E-02 -1. 09046631E-01 -4. 41780245E-01  
-8. 96988422E-02 -3. 86854790E-01 -1. 44533853E-01 -1. 73797762E-01 -9. 83227786E-02  
6. 01407380E-02 3. 34935969E-02 -1. 47170061E-01 -1. 18943075E-01 1. 81817329E-01  
2. 36559558E-01 -4. 31951068E-01 -1. 92584477E-01 -1. 96746739E-02 1. 01284826E-01  
-2. 29322289E-01 -5. 38622803E-01 2. 95700400E-01 -1. 20230809E-01 -3. 54004361E-01  
-1. 77290766E-01 4. 04772911E-01 1. 18241173E-01 -6. 96685473E-01 1. 68265879E-01  
2. 16488865E-01 -4. 30212834E-01 -5. 91040862E-01 -2. 16639367E-01 1. 69525538E+00  
7. 77553245E-02 -3. 99573318E-02 9. 79405605E-03 -3. 46371048E-02 3. 16832975E-02  
3. 67764904E-02 1. 66981131E-02 7. 41696155E-02 1. 18720929E-01 4. 21918239E-01  
6. 43680348E-01 -1. 95185281E-01 7. 77379413E-01 1. 90195152E+00 -5. 05078445E-01  
-2. 00145033E-02 8. 82774444E-04 2. 06626703E-01 9. 04714771E-02 -1. 75404720E-02  
3. 96648515E-02 3. 46309128E-03 1. 52590088E-01 2. 91266495E-02 6. 04718103E-02  
1. 02093023E-01 4. 03214762E-02 -2. 59661325E-01 -1. 21454011E-01 1. 43423298E-01  
-1. 54642850E-01 -3. 61138023E-01 2. 82535778E-01 9. 44621867E-02 1. 33605488E-01  
-3. 21375719E-01 1. 18750894E-01 7. 67369467E-03 1. 04175350E-04 1. 35794510E-02  
4. 87407067E-02 -1. 09151387E-01 3. 30202467E-04 -7. 80551857E-02 3. 41770432E-02  
-5. 75759668E-01 -7. 60172047E-01 2. 67934137E-01 -7. 79260853E-01 -2. 01705502E+00  
5. 15964587E-01 2. 94416116E-01 5. 95762730E-01 -6. 00044619E-01 -4. 64496900E-01  
-1. 15610158E-01 5. 90628951E-01 -1. 09848378E-01 -3. 94720187E-01 8. 28591592E-02  
6. 38264890E-01 1. 17181874E-01 -2. 13363699E+00 3. 46228417E-01 -8. 44203784E-03  
1. 96175945E-02 -1. 26916258E-01 3. 46847745E-01 4. 84701390E-01 -2. 73747228E-01  
-2. 01377701E-02 1. 26449151E+00 -1. 17554468E-01 -7. 06167683E-02 -1. 08386290E-02  
-4. 68465288E-04 1. 24845295E-02 -9. 02230924E-02 7. 43830210E-02 5. 56703045E-02  
-1. 38621080E-01 -1. 24299404E-02 6. 41813710E-02 -1. 88659764E-02 7. 71819144E-02  
-7. 77960989E-02 -5. 75155226E-02 1. 53662367E-02 4. 63111026E-02 -8. 29425264E-02  
4. 87930625E-01 3. 36370962E-01 -1. 40739396E-01 2. 25414432E-01 8. 60264812E-01  
-1. 88912160E-01 -3. 52643745E-01 -8. 30323592E-01 6. 76789299E-01 -7. 90707080E-02  
-1. 06142973E-01 -7. 57069983E-02 -5. 29284072E-02 -8. 74003065E-02 -3. 36620081E-02  
9. 99711602E-03 1. 30944752E-01 -7. 34670176E-02 -7. 48460198E-02 1. 88319971E-02  
4. 62862101E-02 5. 23954375E-02 -5. 07594346E-02 -1. 96924077E-02 6. 89132625E-02  
9. 51314358E-02 -2. 35836977E-02 9. 18363143E-02 1. 06795001E-01 -4. 93991789E-02  
7. 28656118E-02 2. 02342841E-01 5. 35569059E-03 -1. 82292375E-02 1. 04533642E-01  
-6. 25822339E-03 -1. 10233127E-01 -5. 79122238E-02 -2. 34898390E-02 3. 54310533E-02  
-3. 05280271E-01 -5. 02653517E-02 -4. 92523655E-02 -6. 85311883E-02 -1. 22716548E-01  
-1. 29197515E-01 -2. 91214345E-02 -3. 00773974E-02 -1. 69229646E-01 -2. 73899907E-01  
1. 09561561E-01 -3. 93205404E-02 2. 32026688E-02 -1. 18151201E-01 4. 57707864E-01  
-4. 89798302E-01 -3. 42892923E-01 -2. 54188819E-01 8. 12627677E-01 3. 08666048E-01  
-3. 00229924E-01 5. 08712183E-01 4. 42988357E-01 9. 27347009E-01 5. 06915151E-01  
-4. 92686888E-01 2. 76039194E-01 4. 04902540E-01 -1. 52080396E-01 -5. 03030434E-01

-3. 05178603E-01 4. 43205838E-01 5. 89449035E-02 3. 36213538E-01 6. 91950314E-02  
3. 67710660E-01 1. 31087869E+00 -2. 04197582E-02 8. 13479312E-02 3. 40977034E-02  
7. 62569066E-03 6. 82719433E-02 2. 62746300E-02 -1. 72118234E-01 2. 22321908E-02  
9. 88571293E-02 -9. 24036088E-02 -9. 05152911E-02 -2. 72227920E-02 1. 07486040E-01  
-1. 51524340E-01 -7. 55979776E-02 5. 82117508E-02 -3. 90790255E-02 -1. 89768792E-01  
7. 73987219E-02 -2. 83379195E-03 1. 19268932E-01 -1. 76555879E-01 -1. 71082006E-01  
-3. 37050641E-03 2. 79593388E-02 -7. 12285303E-02 -3. 54159357E-02 9. 30384084E-02  
7. 68475202E-02 -4. 11564399E-02 -2. 92614317E-01 1. 48328373E-01 -1. 47618817E-01  
-1. 47913116E-02 -1. 00916992E-02 1. 24414564E+00 -2. 95855207E-01 -4. 99220999E-02  
-9. 98347003E-02 2. 66669012E-01 4. 25782292E-01 -2. 58656891E-01 -4. 88234569E-01  
-3. 40137715E-01 5. 01782855E-01 5. 36711963E-01 -4. 17412760E-01 3. 23560761E-01  
8. 22673370E-01 2. 13816279E-01 2. 31820577E-01 -3. 69207776E-01 2. 54012945E-01  
1. 73370692E-01 -5. 23599981E-01 -3. 67809618E-01 -4. 50499395E-01 9. 07927245E-01  
-4. 41685185E-01 -3. 42682764E-01 1. 33718312E-01 -5. 67270605E-01 -9. 38277385E-01  
2. 80910238E-01 1. 85370694E-01 2. 44069612E-01 -1. 92160854E-01 -1. 42162898E+00  
-1. 20026461E-01 2. 37791224E-01 -1. 29061172E-01 -1. 43349992E-01 3. 36249052E-02  
2. 31940548E-01 3. 35917072E-02 -1. 24614272E-01 -7. 02426775E-01 4. 48480029E-01  
-8. 26507182E-03 6. 36017303E-01 -7. 30266069E-01 4. 16636492E-02 -5. 46238229E-02  
8. 52993617E-02 -1. 17307783E-01 -9. 57546990E-01 1. 77530661E-01 4. 89893752E-01  
2. 10893287E-01 -1. 73069994E-01 -1. 44303608E-01 9. 00842330E-01 -1. 96852191E-01  
-7. 30048971E-01 -1. 28883246E+00 3. 29835836E-01 -4. 63643328E-02 3. 94146885E-01  
-1. 82935365E-01 1. 62813827E-02 -1. 12797626E-01 4. 04281844E-02 -1. 67153534E-01  
-2. 74388170E-01 4. 87487032E-02 -3. 36458255E-01 3. 61464309E-02 -1. 11247992E-01  
5. 94732434E-02 -2. 30968020E-01 7. 61299002E-02 -1. 04917749E+00 -3. 80137032E-01  
2. 49946399E-01 4. 54241348E-01 2. 80682796E-01 -4. 19373949E-01 -4. 43699213E-01  
3. 89634678E-01 -3. 32681289E-01 -7. 54348411E-01 -2. 56490328E-01 -1. 67465610E-01  
3. 97315813E-01 -1. 90766192E-01 -3. 38612874E-01 4. 44896029E-01 3. 83499151E-01  
3. 78725806E-01 -9. 43498775E-01 -1. 16484082E-01 1. 09194397E-01 -1. 18625756E-03  
2. 61722942E-02 -1. 10069903E+00 2. 38634723E-01 2. 81568487E-02 1. 38158623E-01  
-2. 10607784E-01 -3. 87164815E-01 4. 21854154E-01 2. 87079023E-01 2. 72037115E-01  
-7. 11217359E-01 -3. 09764155E-01 2. 67014150E-01 -4. 26843026E-01 -3. 82496269E-01  
-2. 02605786E-01 -3. 15544008E-01 2. 94693778E-02 -3. 40352907E-01 -1. 31888166E+00  
9. 10788062E-03 1. 35124487E-02 -5. 10301570E-02 -1. 00898017E-01 -8. 22816530E-01  
-4. 45419818E-01 4. 48906765E-01 -3. 02346462E-01 -3. 66298256E-01 1. 76252432E-01  
4. 39184130E-01 2. 55828725E-01 -3. 82330536E-01 5. 98486224E-02 6. 88739937E-02  
-3. 94483991E-03 6. 63978487E-02 1. 40759966E-02 1. 48656224E-02 -5. 77940902E-04  
1. 51125614E-02 1. 24700760E-01 1. 71653909E-01 -1. 17354721E-02 -9. 22412200E-03  
-5. 26695230E-02 2. 16399824E-02 3. 56311494E-02 -2. 80888751E-02 3. 31817413E-02  
1. 28629175E-01 5. 24087999E-02 2. 74398721E-02 5. 73362021E-02 3. 96926332E-02  
1. 16039614E-01 -3. 04097044E-02 4. 77374164E-02 -2. 22810987E-02 2. 92103270E-02  
1. 61129902E-01 -2. 86305265E-04 -2. 49032801E-02 2. 38257552E-02 1. 32708711E-01  
-1. 66414825E-02 -3. 18090592E-02 8. 25050254E-03 -1. 72767607E-03 6. 84729669E-02  
4. 21909913E-02 4. 68864399E-02 4. 77020200E-02 5. 02931353E-02 -5. 15686311E-02  
4. 84327216E-02 -3. 81832572E-02 8. 72615995E-02 3. 23164698E-02 -4. 08074370E-02

|                 |                  |                 |                  |                 |
|-----------------|------------------|-----------------|------------------|-----------------|
| 5. 83039422E-02 | 1. 40159014E-03  | 1. 59540027E-01 | -8. 04040928E-03 | 5. 89309580E-02 |
| 4. 24656291E-03 | 8. 25140633E-02  | 1. 14368713E-01 | 2. 42743315E-02  | 1. 13202465E-02 |
| 2. 29521096E-02 | -2. 22117220E-02 | 1. 30341128E-02 | 8. 84701411E-03  | 3. 25041701E-02 |
| 1. 02297135E-01 | 9. 02400362E-02  | 2. 99292859E-02 | 4. 77060406E-02  | 4. 77255334E-02 |
| 6. 66623574E-02 | -6. 85082303E-02 | 2. 01094644E-02 | -4. 18639318E-02 | 1. 18862062E-01 |

### Dipole moment derivatives of Dendrimer-2:

|                  |                  |                  |                  |                  |
|------------------|------------------|------------------|------------------|------------------|
| -2. 06938918E+00 | 9. 20784258E-01  | -7. 24850375E-01 | 3. 93842175E-01  | -2. 16919536E-01 |
| 8. 68558354E-04  | 2. 28514012E-02  | -9. 78367417E-02 | 5. 25955148E-02  | 2. 74396100E+00  |
| -1. 20770397E+00 | 9. 90908762E-01  | -1. 85573130E+00 | 8. 97562134E-01  | -5. 63802622E-01 |
| 1. 75680216E+00  | -6. 93854327E-01 | 5. 66872394E-01  | -2. 51947874E-01 | 7. 30322790E-02  |
| -1. 30923714E-01 | 9. 95495296E-01  | -5. 85153732E-01 | 2. 98041169E-01  | -1. 64827247E+00 |
| 6. 73303353E-01  | -6. 30218414E-01 | 1. 84737469E+00  | -6. 38597138E-01 | 3. 27411723E-01  |
| -2. 73668880E-01 | 1. 70582836E-01  | -1. 91564719E-01 | -1. 88577550E-01 | -8. 40312981E-02 |
| 1. 88537418E-01  | -2. 06774596E+00 | 7. 36499501E-01  | -3. 90252852E-01 | 1. 38844496E+00  |
| -6. 41340689E-01 | 4. 85643058E-01  | -1. 44245447E+00 | 7. 32358306E-01  | -6. 36857575E-01 |
| 2. 64809617E-01  | -1. 42340485E-01 | 1. 50921911E-01  | -9. 55696786E-01 | 3. 53822057E-01  |
| -3. 50208214E-01 | 1. 36994300E+00  | -6. 47358020E-01 | 4. 18830721E-01  | 2. 37506776E-02  |
| 3. 94703945E-02  | -1. 30681785E-03 | -1. 34487466E-01 | 2. 25404690E-01  | -3. 69887234E-02 |
| 1. 38052159E-01  | -4. 44202028E-02 | 2. 04240377E-01  | -1. 93036435E-01 | 1. 34558654E-01  |
| -1. 22264032E-01 | -5. 93122511E-01 | 5. 88689824E-01  | -3. 24982280E-01 | 7. 32241873E-01  |
| -4. 47149188E-01 | 9. 35773104E-01  | -1. 79906609E-01 | 4. 32659613E-02  | 4. 05673311E-02  |
| -1. 95041737E-02 | 8. 95816317E-02  | 2. 50731845E-02  | 1. 16962057E-01  | -3. 18623277E-03 |
| 4. 40735611E-02  | 5. 27407543E-03  | -3. 63123811E-02 | 8. 39697858E-02  | -3. 49736387E-02 |
| 8. 15442728E-02  | 6. 51055867E-03  | 8. 89791750E-02  | 1. 26180640E-03  | 6. 29869691E-02  |
| -3. 04113995E+00 | 1. 07827913E+00  | -6. 58175418E-01 | 2. 27004865E+00  | -1. 29695705E+00 |
| 7. 52951195E-01  | -1. 21809429E+00 | 5. 79068622E-01  | -9. 58325255E-01 | 1. 96060239E-01  |
| -7. 53119086E-02 | 1. 92175045E-02  | 1. 62355336E-01  | -1. 17294900E-01 | -7. 52460033E-03 |
| -1. 97758462E-01 | 8. 99838727E-02  | -1. 10988438E-01 | -2. 04509435E-01 | -3. 14781180E-02 |
| -3. 33999310E-02 | -1. 23623990E-02 | 3. 76718806E-02  | -3. 98701371E-03 | 3. 53668718E-02  |
| -2. 45351002E-02 | 7. 71784933E-02  | 3. 55117068E-02  | -1. 25803420E-02 | 6. 30833891E-02  |
| -8. 77806364E-02 | 5. 85848607E-02  | 3. 62606858E-02  | -1. 15073848E-01 | 1. 02609032E-01  |
| -1. 67559073E-01 | 4. 59273349E-02  | 7. 02589058E-02  | 4. 73883723E-03  | 1. 16732402E-01  |
| -9. 60808369E-02 | 1. 68971527E-02  | 2. 88579847E-02  | -3. 25647720E-03 | 5. 99876251E-02  |
| 1. 49011204E+00  | -3. 94408793E-01 | 4. 41164348E-02  | 2. 23900189E-02  | 1. 51517298E-01  |
| 9. 63890716E-02  | -6. 46549513E-01 | 2. 09771863E-01  | 1. 16756275E-01  | 1. 53630021E+00  |
| -1. 96274946E-01 | -3. 59762041E-01 | -6. 60565344E-02 | 2. 92210354E-01  | -1. 64535687E-01 |
| -5. 75279361E-01 | 8. 30408277E-02  | 3. 55336386E-01  | -3. 59736899E-02 | 3. 43840827E-02  |
| 1. 20438463E-02  | -1. 44242068E-01 | -4. 56739097E-02 | 4. 76060902E-03  | 1. 91900318E-01  |
| 1. 02227070E-02  | 1. 73146437E-02  | -1. 86349024E-01 | 9. 79099209E-02  | -1. 13763562E-01 |
| 8. 41415024E-02  | 5. 43174041E-02  | -9. 13562644E-03 | -1. 04480553E-01 | -2. 81357804E-03 |
| -5. 01768682E-02 | -1. 23080563E-01 | 1. 50219531E-02  | 2. 04010689E-02  | -1. 07155051E-01 |
| 6. 61836673E-02  | 3. 90298788E-02  | -9. 37575119E-02 | 2. 83642870E-02  | -6. 58033221E-02 |
| -1. 39954327E-01 | 5. 22363571E-02  | 4. 52092657E-02  | -4. 22876839E-02 | -6. 97416175E-02 |
| 6. 84436688E-02  | -4. 63321611E-03 | 4. 15206484E-02  | 1. 22253179E-02  | -2. 44379288E+00 |

3. 41495011E-01 6. 14328266E-01 6. 63955003E-01 -5. 77634859E-01 -2. 92746092E-01  
1. 74426750E+00 -4. 89566212E-01 -8. 32701422E-01 2. 73914259E+00 1. 59231435E-01  
-5. 44559759E-01 -5. 00419544E-01 1. 05218554E+00 5. 09639213E-01 -1. 77646233E+00  
6. 09089960E-01 1. 03140144E+00 -1. 19035170E+00 -2. 48613328E-01 4. 91252422E-02  
2. 92909238E-02 -7. 75967205E-01 -2. 23157497E-01 4. 62597492E-01 -2. 72145699E-01  
-5. 30841797E-01 -5. 57659864E-01 -8. 91820397E-02 1. 13795490E-01 -1. 17675253E-01  
1. 76339883E-01 2. 27340266E-01 2. 16817296E-01 2. 08907387E-01 1. 62314707E-01  
-3. 22058779E-01 -3. 10102799E-01 -2. 52560071E-01 3. 55720099E-02 -3. 76017594E-01  
-2. 10586127E-01 1. 12781585E-01 -2. 75627088E-02 -1. 99564889E-01 -4. 54957765E-01  
3. 19568463E-01 3. 57541659E-01 -1. 76319076E-01 -1. 63593443E-01 1. 96208769E-02  
-1. 74425975E-04 -1. 99809406E-01 -3. 31185366E-01 7. 04014396E-01 6. 27633181E-01  
3. 94039857E-01 8. 71919962E-01 1. 21551358E+00 6. 46890719E-01 5. 22310629E-01  
6. 69520665E-01 5. 49561719E-01 1. 73538379E-01 1. 70378587E-02 3. 55940817E-02  
7. 23059435E-02 6. 86221467E-02 -5. 16673673E-02 4. 61368078E-02 -5. 39267207E-02  
4. 41972647E-02 8. 98524840E-01 -5. 11374843E-01 -7. 30899530E-01 -5. 85598714E-01  
5. 94508403E-01 6. 24995385E-01 -9. 93573034E-01 7. 33791219E-01 1. 18422169E+00  
1. 67131950E-01 -4. 18917190E-02 -3. 32284962E-02 -1. 96992674E-02 6. 35258595E-02  
-4. 54234852E-02 -3. 23876885E-02 -3. 10037036E-02 9. 50091619E-02 -2. 29894194E-01  
4. 41475825E-02 -7. 77491697E-04 1. 49636272E-02 -4. 09670632E-01 -1. 97729407E-01  
2. 37197353E-02 -2. 17348107E-01 -3. 87826844E-01 -6. 43882542E-02 -5. 08203211E-02  
4. 37866611E-02 -6. 40404479E-02 1. 34227613E-01 3. 49423026E-02 5. 14717114E-02  
3. 08662974E-02 1. 25119840E-01 -1. 43051565E+00 5. 91200149E-01 9. 32278125E-01  
5. 33638944E-01 -6. 66577006E-01 -5. 84099648E-01 1. 08986204E+00 -6. 95928716E-01  
-1. 27181287E+00 -1. 16328467E+00 -8. 36466309E-01 -3. 89783940E-01 -1. 04292862E+00  
-1. 41593405E+00 -6. 41930502E-01 -3. 72536087E-01 -5. 30456596E-01 -5. 96873151E-01  
1. 21871877E+00 -4. 76784627E-01 -6. 75154570E-01 4. 37308665E-02 3. 59155165E-01  
-1. 60127599E-02 -2. 97650432E-01 1. 54235773E-01 6. 10849376E-01 -7. 61842593E-02  
5. 94708665E-02 8. 83934619E-02 -4. 28201342E-02 -1. 11810319E-01 6. 00881020E-02  
2. 43463601E-02 2. 84481882E-02 -1. 45321944E-02 -1. 40815184E-01 1. 01501826E-01  
8. 28049427E-02 -2. 13565240E-02 1. 63867430E-02 4. 87030120E-03 -4. 75137126E-02  
-6. 82897810E-02 -1. 69392364E-01 1. 02775393E+00 6. 23095446E-01 2. 96991535E-01  
3. 91656521E-01 7. 94942670E-01 2. 05962749E-01 -1. 25005202E-01 -1. 41676115E-01  
3. 04916614E-01 -6. 82281318E-02 -1. 30427206E-01 -1. 06893409E-01 -4. 03024622E-02  
-7. 17455750E-02 -4. 65428919E-02 3. 68062758E-02 2. 71902388E-02 -1. 37714019E-01  
-1. 43135466E-01 -1. 28984044E-02 -5. 07603766E-02 6. 13108095E-02 -9. 95179081E-02  
-1. 52629518E-02 1. 42103341E-02 3. 85152974E-02 3. 33525670E-02 -1. 58573952E-02  
5. 00182473E-02 -3. 02262481E-02 -2. 82285213E-02 1. 16310720E-01 6. 96531258E-02  
-1. 37679575E-01 1. 09101513E-01 1. 78103245E-01 -1. 09046951E-01 5. 20537860E-02  
-4. 02277563E-02 2. 81637174E-02 -2. 46990876E-01 -5. 43908292E-02 2. 32390298E-02  
-1. 51355563E-01 -1. 95962926E-01 -1. 93392779E-01 4. 18193018E-02 4. 25476542E-02  
1. 60464421E-01 -1. 03366341E-01 -1. 32387247E-01 7. 58918296E-02 -9. 92253024E-03  
-2. 40926431E-01 2. 44263813E-01 3. 88455174E-01 5. 36592958E-03 1. 41959738E-01  
1. 30727532E+00 1. 93167616E-01 -7. 92063407E-02 4. 82885725E-03 2. 03892890E-01  
7. 17148083E-01 1. 10326680E-01 -6. 17525022E-01 3. 14380685E-01 2. 79402426E-01

-3. 13183703E-01 -6. 30973843E-01 -9. 85674664E-02 8. 05936329E-01 1. 97375329E-01  
-3. 36384158E-01 -2. 68122846E-01 -4. 13057849E-01 5. 17550931E-01 6. 29300013E-01  
-3. 47766182E-01 6. 29882950E-01 6. 80106758E-01 8. 39088249E-02 -4. 40546841E-03  
3. 23881823E-02 2. 49407545E-02 8. 95367209E-02 9. 15422779E-02 8. 98698511E-02  
1. 75827780E-01 1. 00027725E-01 -7. 61004231E-02 -1. 35554370E-02 6. 59908565E-03  
5. 70961857E-02 -2. 41775494E-01 -5. 31786400E-02 1. 00895649E-02 -1. 16529711E-01  
-2. 07748275E-01 -1. 05196582E-01 -3. 64697885E-02 -2. 08233943E-02 -2. 06642713E-01  
-2. 15855935E-01 -6. 30206161E-02 -1. 00265380E-01 -2. 04735898E-02 -1. 87847928E-01  
7. 73866934E-01 -6. 17153649E-01 -2. 93927736E-01 -3. 66734860E-01 6. 86278520E-01  
2. 89662182E-01 -1. 58747477E-01 2. 75357207E-01 2. 70908386E-01 1. 34774135E+00  
3. 73480584E-01 3. 94301830E-01 2. 02672748E-01 2. 67689351E-01 1. 09706904E-01  
2. 89267368E-01 1. 27710947E-01 2. 48112223E-01 -8. 60403175E-03 2. 36380044E-01  
1. 38594859E-01 3. 57695289E-01 9. 12656233E-01 5. 70911884E-01 2. 11903789E-01  
5. 59374387E-01 4. 35726646E-01 3. 61417267E+00 -1. 43626752E+00 8. 98913082E-01  
-1. 27223303E+00 4. 84285797E-01 -4. 28121032E-01 7. 83360901E-01 -3. 83804774E-01  
2. 96193953E-01 -3. 69107590E+00 1. 42735910E+00 -8. 48381084E-01 9. 53822669E-01  
-5. 16521740E-01 2. 47291146E-01 -2. 60968022E-01 6. 13194108E-02 -2. 06696710E-01  
1. 14824277E-01 -4. 26957407E-02 4. 75482565E-02 -6. 01410930E-02 5. 49129092E-02  
6. 16632555E-02 -3. 16857423E-03 8. 49059726E-02 -3. 93544093E-02 9. 83056214E-02  
3. 06821406E-02 1. 40288667E-02 3. 86469901E-02 2. 61442823E-02 7. 69385076E-02  
-4. 53416458E-02 9. 31764730E-02 -1. 70826807E-02 3. 90629649E+00 -1. 37984952E+00  
6. 32980190E-01 -1. 07564963E+00 4. 00931294E-01 -3. 74817653E-01 4. 40689607E-01  
-9. 63924453E-02 2. 56359521E-01 -3. 56951906E+00 1. 47948419E+00 -7. 04649390E-01  
1. 13942049E+00 -3. 94651011E-01 3. 10326791E-02 -1. 87860901E-01 -2. 07960660E-01  
-8. 65940888E-02 6. 83013072E-04 -4. 93657080E-02 6. 13637278E-02 -2. 24877958E-02  
6. 89073657E-02 8. 33339979E-02 -1. 89974910E-01 1. 17047555E-01 2. 05990718E-02  
3. 74621320E+00 -1. 70572737E+00 5. 69308040E-01 -1. 00576182E+00 5. 27303347E-01  
-3. 66139800E-01 3. 28027277E-01 -9. 51364574E-02 1. 84918891E-01 6. 62026879E-02  
1. 51559424E-02 -9. 60544547E-04 -3. 30599394E-03 1. 11111878E-01 1. 21928607E-02  
-6. 12884850E-02 -3. 22132837E-02 2. 08988415E-01 -7. 11326361E-02 4. 69289273E-02  
6. 02417719E-02 1. 19029921E-01 -2. 51792609E-02 -2. 15026960E-02 9. 87213025E-02  
-9. 27758083E-03 -1. 13726926E-02 -3. 57542114E-02 6. 57699642E-02 -7. 43955519E-03  
-7. 23870356E-02 3. 50374986E-02 8. 35182598E-02 -8. 53606861E-04 5. 77156629E-02  
3. 65021576E-02 -4. 72105008E-02 -4. 45939556E-02 1. 96916905E-03 -7. 44276562E-02  
-7. 76639926E-02 -2. 52467675E-02 6. 19918544E-02 -4. 88875873E-02 -4. 13718297E-02  
-1. 14531433E-01 -2. 15945282E-02 -3. 04528210E-02 -8. 29820244E-02 -8. 41775243E-02  
-8. 82526745E-03 4. 48879973E-02 -2. 39703158E-02 -4. 28251331E-02 -4. 72420176E-02  
4. 65520631E-02 -6. 88501921E-02 1. 34414878E-02 1. 70179476E-02 3. 51783718E-02  
-3. 15257095E-02 5. 97078766E-02 -3. 18763287E-02 -3. 83226503E+00 1. 57967339E+00  
-4. 87460135E-01 1. 38133488E+00 -6. 98753700E-01 1. 81715832E-01 -4. 06053788E-01  
9. 41626951E-02 -1. 66644308E-01 4. 00306500E+00 -1. 67445041E+00 4. 39973371E-01  
-1. 43606506E+00 6. 28694111E-01 -2. 25975804E-01 2. 84868541E-01 -1. 86299604E-01  
1. 02440630E-01 1. 16976147E-02 -5. 01258273E-02 5. 92187603E-02 1. 61909451E-02  
6. 26531139E-02 5. 20734162E-02 -1. 50708137E-02 7. 53737916E-02 2. 52681580E-02

9. 80194691E-02 -6. 47856056E-02 3. 64560052E-02 2. 26458997E-02 5. 14437806E-02  
6. 65640267E-02 -6. 30291537E-03 8. 86295226E-02 1. 38472086E-02 -4. 09256992E+00  
1. 65131873E+00 -4. 20854330E-01 1. 38863985E+00 -6. 66260112E-01 8. 23669232E-02  
-3. 07515172E-01 2. 96998104E-02 -8. 06213098E-02 1. 84887650E-02 2. 52678171E-02  
1. 40697452E-04 7. 78351877E-02 1. 35393350E-02 7. 73426320E-02 -2. 16477608E-04  
8. 53093379E-02 2. 62994897E-02 4. 22115203E+00 -1. 77150491E+00 3. 54686278E-01  
-1. 62700033E+00 6. 83606164E-01 -1. 78370497E-01 2. 95283352E-01 -1. 97528408E-01  
8. 88144558E-02 5. 36859562E-01 3. 77889631E-01 -1. 03481989E-01 -1. 71548503E-01  
5. 90931577E-01 -5. 30899049E-02 1. 78667488E-01 -7. 94575194E-02 1. 75818613E-01  
-3. 19040302E+00 1. 35060972E+00 -3. 60321630E-01 8. 14230863E-01 -5. 02747947E-01  
1. 48890217E-01 2. 54635990E-01 -1. 66824875E-02 -8. 99958514E-02 -1. 09928549E+00  
-3. 14435614E-01 3. 28669184E-01 1. 84241996E-01 -6. 70280276E-01 2. 64507060E-01  
4. 03303815E-02 4. 46619216E-01 -6. 75281602E-01 3. 04933634E+00 -8. 91913370E-01  
5. 00121799E-02 -1. 65566910E+00 1. 16469913E+00 -4. 00828934E-01 8. 32971387E-01  
-8. 01939526E-01 6. 54374601E-01 -1. 72087338E+00 5. 50232219E-01 -7. 39814313E-02  
7. 24829073E-01 -3. 22482392E-01 2. 07705866E-02 -1. 66917246E-01 7. 61562229E-02  
-6. 00777687E-02 5. 85617557E-01 -2. 17739177E-02 -1. 16948701E-01 4. 37838079E-01  
3. 25870937E-02 1. 80370821E-02 -6. 50786124E-01 1. 81454241E-01 1. 91149129E-01  
-6. 49456603E-01 8. 37957566E-02 1. 85204826E-02 -1. 60810722E-01 -2. 41248511E-01  
-2. 59165245E-02 3. 17511501E-01 -1. 10328085E-01 -2. 78866586E-01 3. 26315960E-01  
-1. 75640868E-01 1. 56802450E-01 -5. 99626278E-01 4. 34812781E-01 -9. 20971655E-02  
6. 27334525E-01 -2. 34514279E-01 2. 16564193E-01 -5. 22617980E-01 1. 11310842E-01  
-6. 10722761E-02 4. 07312973E-01 -4. 71748205E-01 4. 15410276E-02 -3. 82467834E-01  
1. 36662039E-01 -3. 32221837E-01 2. 61155659E-01 9. 29887774E-03 -4. 50071937E-02  
5. 64636708E-01 -3. 45999713E-03 1. 64718129E-02 -7. 35384769E-01 2. 37716835E-01  
1. 51864977E-01 -2. 93577050E-01 2. 43498122E-02 -1. 87976926E-02 -3. 41456700E-01  
-1. 87930014E-01 -1. 96761953E-02 4. 25835695E-01 -1. 42656269E-01 -2. 50937780E-01  
1. 04633832E+00 9. 30462133E-02 1. 65728090E-01 7. 05450905E-02 1. 39320651E+00  
1. 54977959E-01 6. 53149800E-01 -3. 12946530E-01 1. 56412551E+00 -8. 45926651E-02  
1. 45580659E-01 -1. 88304241E-02 -1. 86325989E-02 -9. 40673341E-02 -1. 31941062E-02  
-7. 32755948E-02 5. 69247911E-02 -1. 07833812E-01 -7. 49590203E-02 5. 81643182E-02  
4. 26131025E-02 4. 80259916E-02 -9. 92707602E-02 1. 15468684E-01 2. 62561504E-02  
-8. 70972798E-02 6. 08217821E-02 -4. 73988602E-02 1. 00971345E-02 -6. 72064825E-02  
2. 69008468E-02 -8. 77197117E-02 -5. 87970472E-02 3. 54538607E-02 3. 36051599E-02  
-2. 33285582E-02 -1. 78695566E-02 3. 88147423E-02 -1. 11436595E-01 4. 31313464E-02  
-8. 58514025E-02 -7. 40832955E-02 -8. 26498877E-02 -8. 82119151E-02 5. 88659707E-02  
8. 34571617E-02 1. 19788846E-02 7. 31647788E-03 -1. 28973502E-02 9. 58386855E-02  
-5. 78350998E-02 2. 85088984E-03 -5. 88709433E-02 4. 66574782E-03 -8. 38989813E-02  
-6. 58987703E-03 2. 17006706E-02 -1. 30057131E-02 -3. 38700954E-02 1. 09556633E-01  
-4. 83039878E-02 1. 46119834E-01 8. 56871864E-02 3. 55323025E-02 -2. 81136846E-02  
5. 85935556E-02 -7. 57957945E-02 1. 09871600E-01 2. 66605953E-02 3. 24928553E-03  
8. 04017635E-02 -6. 82056522E-03 1. 30319429E-02 9. 83346170E-02 6. 07239385E-03  
1. 07938081E-01 5. 81928960E-02 2. 81718480E-02 -1. 88407761E-03 3. 22699221E-02  
-3. 53867266E-02 5. 16673081E-02 -7. 62967172E-02 8. 14082696E-02 -3. 52351317E-02

4. 93847131E-02 2. 76999041E-02 5. 56986022E-02 4. 40662613E-02 -3. 27177108E-02  
7. 37371028E-02 -3. 40657685E-02 4. 47838867E-03 -2. 26388419E-02 3. 52835714E-02  
-5. 30365521E-02 8. 85062922E-03 -8. 69878334E-02 -4. 60261029E-02 3. 98463456E-02  
-1. 16626873E-01 3. 50022579E-03 -6. 98223687E-02 -3. 57750265E-02 -1. 46429708E-02  
-6. 03228890E-03 -2. 13157121E-02 6. 73108692E-02 -3. 58875003E-01 -2. 94576843E-01  
-5. 57259455E-02 -2. 61363088E-01 -6. 41299580E-01 -1. 19354749E-01 -1. 99605417E-01  
-4. 54643458E-02 -3. 77765854E-01 -2. 55448820E-01 3. 93736560E-02 -1. 52584454E-01  
8. 23076614E-02 -4. 89753744E-01 1. 44912523E-01 -3. 62871816E-01 4. 00191477E-01  
-7. 82726738E-01 -5. 52848505E-01 1. 07123577E-01 -2. 60500155E-03 1. 46627924E-01  
-3. 71601725E-01 -1. 07239090E-01 -1. 55419910E-02 -1. 40178335E-02 -4. 01699459E-01  
5. 57002015E-02 -2. 35934670E-02 -1. 63217769E-02 -4. 67569971E-02 8. 94349654E-03  
-9. 78900002E-03 -2. 36784107E-02 2. 59735204E-03 3. 44334744E-02 1. 11715465E-02  
-5. 21867960E-02 3. 90058879E-02 -5. 11973727E-02 -6. 55951647E-02 8. 70524621E-02  
2. 20377753E-02 9. 50909631E-02 1. 08910251E-02 -5. 41389040E-02 5. 96815612E-02  
1. 12885678E-01 4. 35626134E-02 1. 88889410E-02 -5. 55862379E-02 4. 34928972E-02  
-4. 72447344E-02 -1. 88903599E-02 -2. 06521035E-02 1. 86308733E-02 -1. 11831524E-01  
3. 90793498E-02 2. 97959731E-02 4. 11532421E-02 -5. 83852457E-02 5. 17937360E-03  
-2. 91852723E-02 8. 34062642E-02 -7. 88943345E-03 -6. 05539598E-03 1. 11202434E-02  
6. 31305314E-02 1. 65731778E-03 2. 53459144E-02 2. 70595543E-02 3. 52343848E-02  
2. 77891331E-02 -5. 23070958E-02 -1. 84750885E-02 -5. 01078664E-02 -9. 62090662E-02  
-4. 56253417E-02 -4. 31862747E-02 -9. 28765622E-02 -7. 88706314E-03 -3. 01876737E-02  
4. 77800446E-02 -1. 16020027E-01 -5. 39514526E-03 2. 66175103E-02 5. 66333833E-02  
-3. 67470959E-02 4. 79512999E-02 -3. 53650385E-02 -7. 29358139E-02 2. 22261825E-02  
1. 22464638E-01 6. 32886498E-02 1. 92515973E-02 -4. 57064585E-02 6. 69275749E-02  
-2. 92519692E-03 -1. 33471261E-02 -6. 76668271E-02 -7. 09011631E-03 3. 25816020E-03  
8. 02511469E-02 -1. 93228831E-01 1. 12688214E-01 -1. 85642840E-01 1. 43072057E-01  
-1. 70738218E-02 7. 74016107E-02 5. 52541197E-02 5. 83011151E-02 5. 90382496E-02  
3. 18561357E-01 9. 16811387E-02 1. 26934855E-01 1. 79567866E-01 -3. 93577372E-02  
3. 95837485E-01 3. 71241353E-01 2. 64617137E-02 3. 35212474E-01 1. 20967829E+00  
9. 85360593E-02 1. 03754928E-02 7. 24568705E-02 3. 04925086E-01 -2. 32167490E-02  
-2. 11287910E-02 -6. 36902076E-02 -6. 62821038E-04 -1. 97931547E-02 -1. 33460153E-02  
-4. 62008349E-02 -2. 20519003E-02 -3. 14260887E-02 -9. 16609268E-03 1. 69934270E-02  
4. 41283280E-02 -1. 15656756E-02 -5. 09768983E-02 -4. 81157368E-02 3. 28239024E-02  
-4. 33820850E-02 -1. 14233575E-02 -4. 41312268E-02 -2. 27607372E-04 4. 57509666E-02  
-9. 99904017E-03 -7. 89116624E-02 -2. 36939077E-02 -5. 22325671E-03 -7. 65808385E-02  
1. 40412864E-02 -3. 26945764E-02 -1. 74678423E-02 -5. 91673322E-02 -1. 52115902E-02  
-7. 09380895E-02 1. 81893324E-02 -6. 08609367E-02 -5. 51613781E-02 -1. 01414791E-02  
-4. 93620894E-01 -8. 26514889E-01 1. 42859834E-02 -7. 96090647E-01 -2. 27027473E+00  
-3. 63927836E-02 1. 48206642E-01 3. 22217214E-01 -4. 97407321E-01 5. 57022654E-01  
8. 82803079E-01 6. 54194751E-02 8. 17466785E-01 2. 45686900E+00 3. 62474209E-01  
-1. 79146984E-01 -2. 79183541E-01 1. 28096056E+00 -3. 66576346E-01 -2. 66099080E-01  
-2. 23136679E-02 -2. 39093663E-01 -9. 35632427E-01 -2. 02298407E-01 6. 07599636E-02  
2. 53866718E-02 -9. 93507103E-01 -8. 01882035E-03 -9. 09810084E-02 -1. 72085188E-01  
-7. 44468846E-02 -2. 96154920E-01 -3. 93820850E-01 -1. 45464436E-01 -3. 41052927E-01



1. 17782089E-01 -1. 27789944E-01 -1. 78046279E-02 -4. 25807375E-02 8. 55488908E-03  
-1. 35589652E-01 -2. 05305520E-01 1. 12133737E-01 1. 67472407E-01 -4. 91537236E-01  
-2. 22361635E-01 -1. 20292382E-01 1. 77621174E-01 -1. 79739464E-01 -4. 91113224E-01  
4. 15706064E-01 -9. 30401932E-02 -2. 50017615E-01 -1. 98356237E-01 1. 46900758E-01  
-1. 89591060E-02 -1. 82009185E-01 1. 36158815E-02 1. 52735037E-01 -4. 35822511E-02  
-1. 23827531E-01 1. 96925136E-01 2. 03424621E+00 8. 22041293E-02 -2. 29793146E-02  
2. 21105400E-02 -1. 64585645E-02 7. 05005450E-02 5. 66188752E-02 3. 89853631E-02  
8. 92608207E-02 7. 62556155E-02 4. 29194225E-01 5. 98932870E-01 -4. 43429370E-01  
6. 77203000E-01 1. 53003697E+00 -9. 90353467E-01 -2. 47702188E-01 -4. 83560288E-01  
5. 69829576E-01 1. 20804951E-01 2. 27359333E-02 1. 44587740E-03 2. 57220195E-02  
1. 68879278E-01 -5. 64458807E-03 3. 57461863E-02 6. 38306404E-02 -7. 19430795E-03  
-2. 04814623E-01 -3. 73812496E-02 1. 52952568E-01 -6. 32484930E-02 -2. 50716790E-01  
2. 73110777E-01 9. 06197357E-02 1. 24410673E-01 -4. 91006314E-01 1. 04774323E-01  
-3. 82612126E-02 -4. 39438082E-02 -3. 19907584E-02 1. 59033650E-02 -9. 22931367E-02  
-2. 50294045E-02 -6. 69713266E-02 8. 08694861E-02 -5. 64072266E-01 -6. 57920306E-01  
4. 97672034E-01 -6. 02855592E-01 -1. 48819827E+00 8. 49538077E-01 5. 14400675E-01  
9. 29148175E-01 -1. 14543258E+00 -2. 50069307E-01 -4. 24680279E-02 1. 22405260E-01  
-2. 78892154E-02 -4. 69595851E-01 -3. 83831194E-01 1. 10806560E-01 -3. 22829142E-01  
-2. 29525704E+00 3. 48489004E-01 4. 54678394E-02 8. 48205210E-02 -4. 42599701E-02  
5. 42136792E-01 7. 54239007E-01 -3. 33498885E-02 1. 74464821E-01 1. 09233879E+00  
-1. 09967854E-01 -5. 02471777E-02 -1. 61661101E-02 -1. 74674588E-02 -6. 99437898E-03  
-1. 03558169E-01 2. 24152465E-02 -3. 02446609E-03 -5. 27858363E-02 -1. 11307381E-02  
5. 94521027E-02 -5. 54325910E-02 5. 07121336E-02 -7. 88782359E-02 -9. 61808725E-02  
-4. 07965965E-03 7. 94137528E-02 -1. 56922840E-01 4. 84822956E-01 2. 69317844E-01  
-2. 12702796E-01 9. 37279314E-02 5. 20551803E-01 -1. 41163837E-01 -4. 36275406E-01  
-7. 63336457E-01 1. 03397234E+00 -9. 06221231E-02 -3. 44374557E-02 -5. 74645533E-02  
-9. 56092027E-03 2. 55202329E-02 -1. 58170087E-02 1. 30042094E-04 8. 66791415E-02  
-8. 88973724E-02 -3. 44295093E-02 1. 78314507E-02 3. 64046561E-02 3. 61034278E-02  
-1. 21902715E-01 -3. 80044628E-02 8. 33282890E-02 1. 52809859E-01 -7. 32073681E-02  
2. 17757395E-02 2. 75021225E-02 3. 93818393E-02 9. 38038498E-02 2. 09154638E-01  
-1. 01579817E-01 5. 28976428E-02 -2. 56359799E-02 4. 08821446E-02 -1. 77093126E-01  
-3. 85398185E-02 -1. 45310606E-02 -1. 26695981E-01 -2. 73249288E-01 -1. 98733099E-02  
3. 54317752E-02 -2. 27745102E-02 -8. 08923685E-02 -1. 29222455E-01 -7. 68828383E-02  
1. 38058484E-01 1. 61882504E-02 -2. 50736943E-01 1. 37233966E-01 4. 05843441E-02  
3. 96233748E-02 -1. 33160519E-01 7. 50707452E-01 4. 83036597E-01 3. 63315260E-01  
3. 49067543E-01 4. 49650313E-01 1. 30594915E-01 5. 38914423E-01 3. 56496772E-01  
5. 15455161E-01 2. 16850028E-01 -1. 65266540E-01 3. 08797764E-01 -2. 78879915E-02  
5. 14819200E-01 -4. 66792630E-01 1. 42286260E-01 -6. 30312798E-01 1. 03109435E+00  
2. 83575476E-01 5. 16957103E-01 -2. 38952330E-01 5. 14125558E-01 1. 04571199E+00  
-3. 20821446E-01 -2. 08570807E-01 -2. 70297913E-01 5. 19359656E-02 4. 21231430E-02  
4. 46711750E-02 2. 44283262E-02 6. 29818641E-02 6. 54471533E-03 -1. 15092000E-01  
2. 22001500E-03 -2. 14813901E-02 2. 14113772E-01 -1. 41727145E-01 -9. 02075513E-03  
2. 71099588E-02 -9. 05761617E-03 -1. 46116538E-01 8. 66626434E-02 1. 13433844E-01  
7. 60851234E-02 -2. 26309557E-01 -6. 35489076E-02 6. 46184349E-02 8. 06754092E-02

5. 60158139E-02 -1. 16462195E-01 2. 16322593E-02 -6. 47142090E-02 -5. 16337892E-02  
-3. 12558401E-01 8. 41923052E-01 5. 22754278E-01 -3. 43694137E-01 4. 95313079E-01  
4. 82319163E-01 -2. 28994593E-01 -1. 43534372E-01 -8. 67364171E-02 3. 33565490E-01  
5. 04665813E-01 2. 83642096E-01 5. 99600458E-01 2. 42347414E-01 3. 10605401E-01  
3. 94273839E-01 3. 83493896E-01 2. 90894138E-01 9. 40509403E-01 4. 26312482E-02  
-2. 18164909E-02 -3. 51077801E-01 -6. 58282528E-03 4. 89152347E-02 -2. 46826901E-01  
-3. 04941409E-01 -1. 84527363E-01 1. 22112727E+00 -6. 39932540E-01 -1. 17817985E-01  
5. 53040563E-01 -2. 42690369E-01 -2. 24966427E-01 2. 38436604E-01 5. 99706413E-01  
1. 09389439E-01 -7. 35494771E-01 -2. 84130207E-01 2. 50280668E-01 3. 11585741E-01  
3. 26972826E-01 -6. 28048116E-01 -5. 52669176E-01 4. 03096713E-01 -5. 62823205E-01  
-7. 24210333E-01 -1. 96746064E-01 -3. 10718488E-01 -1. 45479060E-03 -1. 52226129E-01  
-1. 15285442E+00 -1. 44102044E-01 3. 97076664E-02 -3. 28581322E-02 -1. 54594855E-01  
-1. 20140480E+00 -3. 16712108E-01 -3. 41590961E-01 -2. 47252168E-01 -2. 33177855E-01  
-1. 09287290E-01 -3. 04171905E-01 -1. 21735808E-01 -2. 19978834E-01 -2. 22303789E-01  
-1. 94151508E-01 -1. 38838939E-01 -3. 12620740E-01 -9. 20042820E-01 -5. 55887074E-01  
-2. 11125066E-01 -5. 52061564E-01 -4. 46252118E-01 -6. 62266165E-01 5. 26365738E-01  
2. 44558128E-01 3. 79238981E-01 -6. 06086006E-01 -2. 52727479E-01 1. 77595698E-01  
-2. 39435698E-01 -2. 25961595E-01 -4. 27660028E-01 -2. 46813463E-01 -5. 09410877E-01  
-2. 09361563E-01 -2. 62644472E-01 -3. 26450557E-01 -3. 81978968E-01 -2. 96335482E-01  
-8. 66208385E-01 -1. 77745289E-01 -6. 46519443E-02 2. 83871336E-01 -7. 31282403E-02  
-1. 26323709E-01 2. 05332607E-01 2. 49721473E-01 1. 39180336E-01 -1. 24618539E+00  
-7. 48075448E-01 -4. 64348867E-01 2. 91262989E-01 -4. 37814262E-01 -4. 20722230E-01  
1. 81939542E-01 1. 74360982E-01 1. 13224097E-01 -2. 68465818E-01 -6. 66174693E-01  
-4. 17951780E-01 -3. 40853404E-01 -3. 29635281E-01 -3. 82386888E-01 -1. 62042316E-01  
-4. 54698857E-01 -2. 95392787E-01 -4. 34896758E-01 -3. 53772250E-01 -4. 97671301E-01  
1. 47583800E-01 -5. 02744002E-01 -1. 05310765E+00 3. 36496231E-01 1. 18097320E-01  
2. 77380138E-01 -2. 14436473E-01 -1. 75412216E-01 1. 30100596E-01 -2. 45437019E-01  
4. 16776606E-02 -4. 73641822E-01 4. 72619878E-01 -1. 38694422E-01 5. 48524465E-01  
-9. 17677227E-01 1. 12259567E-01 -3. 87188331E-02 1. 74249706E-02 -4. 85705225E-02  
-2. 15429530E-02 1. 07680709E-03 5. 75758006E-03 -3. 81766860E-03 1. 09189220E-01  
1. 00549687E-01 -5. 30578189E-02 3. 47634903E-02 -8. 04547609E-02 1. 25867385E-01  
6. 22668328E-02 3. 48406020E-02 2. 79642179E-02 8. 37576815E-02 7. 65023691E-03  
-1. 38646518E-02 -2. 47561862E-02 3. 05533322E-02 1. 56546919E-01 1. 60843527E-02  
-1. 33008640E-02 -7. 83127348E-03 1. 15541219E-01 3. 11743750E-02 5. 42767531E-02  
1. 86802605E-02 7. 38776213E-02 5. 33072733E-02 -3. 49426115E-02 2. 76876242E-02  
-3. 32817189E-02 1. 12271261E-01 4. 51707625E-02 -4. 23985591E-02 -6. 90032051E-02  
-4. 34709506E-02 8. 92137577E-02 -2. 65477600E-02 -6. 02081214E-02 -1. 60684742E-02  
6. 58857573E-02 1. 28618617E-01 5. 10753400E-02 -6. 49584222E-02 1. 75082361E-02  
1. 13382167E-01 1. 95212296E-02 -4. 32780680E-02 3. 47597764E-02 3. 09359908E-02  
2. 03940080E-02 -7. 00843868E-02 1. 58342632E-02 -6. 16490280E-02 8. 54833993E-02  
1. 06322213E-02 2. 80860306E-02 2. 17414594E-02 9. 14489481E-02 6. 85757280E-02  
-3. 84933567E-02 -8. 75024522E-02 -4. 17968558E-02 9. 84117997E-02 -2. 16113967E-02  
-4. 52647700E-02 -1. 99736494E-02 9. 91388933E-02 6. 02450155E-02 -6. 04343728E-03  
3. 31799956E-02 -2. 00315967E-04 8. 99492351E-02 -5. 30934258E-02 -6. 84201658E-02

|                  |                  |                  |                  |                  |
|------------------|------------------|------------------|------------------|------------------|
| 3. 66342614E-02  | 2. 75954521E-03  | -1. 64886854E-02 | 1. 98517375E-02  | -1. 03222528E-02 |
| -1. 11669208E-02 | -7. 44020601E-02 | -8. 52215737E-02 | 1. 50923866E-02  | -1. 22578672E-01 |
| 1. 77181910E-03  | 2. 80137675E-02  | -7. 72608548E-03 | 2. 05703578E-02  | 4. 10418727E-02  |
| 1. 88853009E-03  | 8. 29431688E-02  | -6. 68516028E-02 | 1. 33294541E-01  | -1. 60284736E-01 |
| -6. 55179076E-02 | -9. 23634530E-02 | 1. 72469787E-02  | -4. 49665325E-03 | -7. 13094054E-02 |
| 1. 06877583E-02  | -7. 46576805E-02 | 6. 03938003E-03  | -5. 85677955E-02 | 8. 38518884E-02  |
| 4. 11890948E-02  | 2. 31553381E-02  | 1. 31482856E-01  | -2. 36627872E-02 | 6. 71555269E-02  |
| -1. 11678846E-02 | -1. 12826333E-02 | 6. 39446373E-02  | -7. 76589696E-02 | 9. 60575902E-02  |
| -2. 92518194E-02 | 7. 48172924E-02  | -6. 91888943E-03 | 8. 79202607E-03  | -3. 36187034E-02 |
| 6. 12864063E-03  | 4. 90432188E-02  | -4. 54355437E-02 | -9. 09093455E-02 | -6. 29475864E-02 |
| -9. 04244123E-02 | -1. 71880792E-02 | -4. 84511243E-02 | 9. 10811262E-03  | -3. 33476083E-02 |
| 2. 67854633E-02  | 6. 89433026E-02  | -2. 69225266E-02 | 5. 96534499E-02  | -2. 61720417E-02 |
| -1. 08268327E-02 | 8. 37433918E-02  | -1. 70861607E-02 | 1. 05338519E-01  | -1. 64797562E-01 |
| 1. 66744926E-01  | 8. 99210261E-03  | 7. 13278776E-04  | 1. 42831080E-03  | -5. 18946657E-03 |
| 4. 31677063E-02  | -1. 65875639E-01 | 8. 40773488E-02  | -5. 11112534E-02 | -1. 89016059E-01 |
| 3. 48652678E-03  | -1. 65644013E-03 | -7. 13274348E-02 | 2. 27017364E-02  | -1. 21309727E-02 |
| 1. 49390812E-02  | -2. 77397989E-02 | 9. 77693315E-02  | 6. 44222509E-02  | -1. 07769867E-02 |
| -3. 93050872E-02 | -8. 50423952E-03 | -1. 14347604E-02 | -9. 80262256E-02 | 1. 98404470E-02  |
| -1. 20469801E-01 | -1. 93324200E-02 | 1. 35628321E-02  | -1. 59468333E-02 | 6. 45558863E-02  |
| 8. 12760728E-02  | -3. 13881363E-04 | 7. 49795616E-02  | -3. 69239512E-02 | 1. 19326171E-01  |
| -1. 20271969E-01 | 1. 90375910E-01  | -2. 01529093E-02 | -8. 48041282E-03 | 1. 03767203E-02  |
| 5. 87878896E-02  | 4. 74907230E-02  | -4. 12844690E-02 | 5. 59076777E-02  | 1. 55328769E-02  |
| 8. 74852063E-02  | 3. 60854570E-02  | 1. 51740575E-02  | -2. 38051806E-02 | -9. 94132115E-02 |
| 2. 80030017E-02  | 8. 65420303E-02  | -7. 26219961E-03 | 4. 21505174E-03  | 5. 28396392E-02  |
| -5. 29255534E-02 | -6. 83395929E-02 | -9. 61100035E-02 | 3. 39928230E-02  | -1. 88686998E-02 |
| 2. 39341907E-02  | -2. 56322267E-02 | -8. 27122141E-02 | -2. 05396211E-01 | 2. 14380415E-02  |
| 6. 43711498E-02  | 6. 02002660E-02  | 5. 59706916E-02  | -4. 08432407E-03 | 3. 93218263E-03  |
| 8. 10143513E-03  | 4. 84981120E-02  |                  |                  |                  |

### Dipole moment derivatives of chromophore AJL-50:

|                  |                  |                  |                  |                  |
|------------------|------------------|------------------|------------------|------------------|
| -1. 85767032E+00 | -7. 41529261E-02 | -1. 42963362E-03 | 8. 70278685E-01  | 1. 37507555E-01  |
| -7. 55481921E-02 | -4. 80446308E-01 | -1. 36296256E-01 | -8. 26482154E-02 | 3. 36932517E+00  |
| 3. 20157595E-01  | -4. 69733922E-02 | 1. 59628547E+00  | 2. 50633861E-02  | 2. 94390857E-02  |
| -5. 83810257E-01 | 2. 64371775E-02  | 9. 82920768E-02  | -1. 05951208E+00 | -4. 54351502E-02 |
| -7. 97540271E-03 | -1. 85706867E+00 | -5. 28464197E-02 | -1. 76524947E-02 | 2. 76701358E-01  |
| -1. 43133394E-02 | -1. 47676835E-01 | 1. 74780465E+00  | -6. 87842891E-02 | 4. 75568571E-02  |
| -5. 37555780E-01 | 1. 24052741E-01  | -5. 96459407E-02 | 2. 19946818E-01  | -5. 37372287E-02 |
| -8. 28234070E-02 | -2. 66334682E+00 | 2. 74644170E-02  | -3. 43827516E-02 | -7. 92424949E-01 |
| -2. 43479726E-01 | 3. 93134296E-02  | 4. 88650776E-02  | 4. 76739767E-02  | 4. 69875895E-03  |
| 8. 33914702E-01  | 8. 97414147E-02  | -5. 72108236E-03 | 1. 19162140E+00  | 5. 08381202E-02  |
| -5. 43004254E-03 | -1. 28593962E-01 | -6. 54383554E-03 | -9. 62810519E-02 | 9. 52496681E-02  |
| -6. 96267582E-03 | -2. 06322100E-02 | 1. 10848633E-01  | 9. 49623907E-02  | 2. 77672862E-02  |
| 8. 99445820E-03  | 4. 74313660E-02  | 1. 30769547E-01  | 8. 96504174E-03  | 4. 26451987E-02  |
| -3. 95383607E-02 | 8. 87604871E-01  | 7. 24654230E-01  | 4. 09844123E-02  | -3. 74565786E-01 |
| -7. 01651523E-03 | 2. 38116434E-01  | -3. 74293201E-02 | 5. 83377486E-02  | -3. 50644473E-02 |

1. 16323935E-01 -2. 20217865E-03 8. 26689520E-03 -6. 40860849E-02 3. 29226782E-02  
9. 93694425E-02 1. 08136125E-01 -6. 77592382E-02 1. 09946508E-02 -8. 10131853E-03  
-8. 47303197E-02 3. 75374092E-02 1. 57826148E-02 3. 42383283E-02 8. 93584237E-02  
8. 10826826E-02 7. 40764623E-02 -1. 97464467E-02 8. 62905102E-02 9. 34172091E-03  
1. 73405202E-02 -6. 40218452E-03 2. 35619294E-02 7. 92000394E-02 -4. 14782801E+00  
-3. 22974305E-02 2. 17222129E-03 -1. 43188711E+00 -6. 50181160E-01 -4. 97325791E-02  
1. 43979341E+00 1. 40401721E-01 -3. 03548867E-01 1. 04083586E-01 -7. 08586727E-02  
3. 76166906E-02 -1. 02150528E-01 -2. 88441563E-02 3. 30930747E-02 -4. 40936869E-02  
2. 16226301E-02 5. 95113516E-02 5. 88241113E-02 -1. 33197767E-02 9. 58478795E-03  
3. 49725097E-02 4. 77095982E-02 -6. 47964152E-02 4. 67364126E-02 -3. 17436905E-02  
-8. 65230207E-02 3. 15553555E-02 7. 79638957E-02 9. 01178997E-03 -6. 60532056E-02  
-1. 29195017E-01 4. 04247439E-03 3. 16623713E-02 8. 34580019E-03 5. 90326574E-02  
-1. 80494536E-01 7. 68279713E-03 -5. 22788516E-02 5. 07406968E-02 9. 39899559E-02  
2. 53451658E-02 -8. 99743972E-02 2. 26680642E-02 5. 62669755E-03 3. 10935673E-02  
4. 52456707E-03 -7. 68640597E-03 -9. 43699919E-02 1. 48563618E-02 -1. 04906075E-02  
-9. 29440209E-02 -3. 95682896E-02 1. 18105983E-02 -8. 98833107E-02 1. 42761908E-02  
-7. 89951834E-02 1. 03764088E-02 5. 89282223E-02 2. 58194084E-03 -2. 92813530E-02  
4. 94270313E-03 2. 83531456E-02 7. 47013788E-03 -8. 15915701E-02 3. 59433928E-02  
-1. 58314298E-01 -1. 23181329E-01 6. 35214757E-02 1. 02053842E-01 6. 56815217E-02  
5. 15611326E-03 1. 22725554E-02 5. 18373467E-02 6. 90286917E-02 9. 26962304E-02  
-2. 64764129E-02 -6. 69751668E-02 -1. 84395906E-02 -6. 63518039E-02 -7. 59919875E-04  
-1. 23864201E-02 1. 62520032E-02 1. 17790304E-02 7. 83533811E-04 6. 60374536E-02  
-7. 53017434E-03 9. 78611722E-02 3. 04197772E-02 4. 99555832E-02 3. 90543709E-02  
9. 62225269E-03 -3. 23571084E-03 4. 73089575E-02 4. 20204514E-02 3. 70083565E-02  
2. 69166497E-02 -2. 61978857E-03 -1. 28347576E-01 -4. 00575504E-03 -9. 80660835E-02  
2. 00904789E-02 -1. 55311863E-01 -1. 34738910E-01 1. 53754318E-02 1. 93921451E-02  
2. 58539066E-02 4. 62020782E-02 -7. 92818771E-02 5. 11091695E-02 -4. 22752347E-02  
1. 90141958E-02 4. 56283396E-02 -1. 40996944E-02 -7. 10840722E-02 -1. 02408880E-02  
3. 00106171E-02 1. 00713545E-01 7. 36725691E-03 9. 24791898E-03 -2. 93906579E-01  
-1. 04324918E-01 -8. 89212917E-03 -1. 22949525E-01 -9. 66081816E-02 -1. 92358401E-01  
1. 81344038E+00 -3. 35538280E-01 -9. 36647477E-03 -8. 27802434E-01 2. 54561870E-01  
-5. 25911183E-02 2. 19962149E-01 -7. 76424726E-02 3. 51552581E-01 -1. 26690097E-01  
3. 88254470E-02 6. 93938370E-02 2. 85718376E-01 -3. 90347657E-02 7. 42390016E-02  
-2. 43582856E-01 2. 80011412E-02 -1. 36741015E-01 -2. 12168997E-01 -1. 10587744E-04  
2. 00639681E-02 -1. 33794073E-02 -9. 55002930E-02 -7. 80982730E-02 8. 03434941E-04  
-4. 74564140E-02 4. 80665927E-02 4. 09358733E+00 3. 90839068E-03 4. 49072049E-02  
-3. 00871637E-01 1. 81661995E-01 -7. 04326765E-02 2. 00656550E-01 -5. 11560881E-02  
-5. 88365473E-02 -3. 81827193E+00 5. 69062590E-02 -5. 46681299E-02 7. 33627995E-01  
-1. 46703442E-01 8. 69054552E-03 -4. 14116265E-01 8. 36769468E-03 -1. 29247408E-01  
8. 13395005E-02 7. 72853666E-03 6. 38727866E-03 -4. 56314724E-02 -9. 67057712E-02  
2. 87075580E-02 -5. 65849480E-04 4. 46503453E-02 8. 06046425E-02 2. 07476996E-02  
-6. 43284281E-02 -3. 26221482E-02 -1. 06690388E-01 -4. 48564297E-02 2. 56446389E-02  
6. 35626235E-02 3. 68438095E-02 9. 66439014E-02 4. 02123720E+00 -1. 88825986E-01  
5. 18190108E-02 -6. 63803992E-01 2. 59740051E-01 -1. 26563248E-01 3. 29255762E-01

-1. 31556132E-01 1. 09947365E-02 -4. 05093404E+00 3. 78745888E-01 -1. 01466863E-01  
7. 98124178E-01 8. 64625523E-01 3. 69481158E-01 -3. 05661506E-02 -1. 95345265E-01  
-9. 56188533E-02 -7. 69805468E-03 -1. 31380854E-03 1. 37192294E-02 -1. 49147723E-01  
2. 62874347E-02 2. 14769474E-02 -7. 49810376E-02 5. 80722202E-02 8. 78440000E-02  
4. 24945194E+00 -3. 22988622E-01 2. 06632447E-01 -9. 94112468E-01 3. 04546731E-01  
-1. 78698866E-01 4. 70590696E-01 -1. 52661347E-01 7. 90658876E-02 1. 82783633E-02  
3. 17559566E-02 7. 79845138E-03 -3. 49009432E-03 2. 34079625E-01 7. 65487511E-03  
-2. 57019204E-02 9. 04995136E-02 1. 25497586E-01 -8. 31317672E-02 7. 92816607E-02  
4. 33910399E-02 7. 92225789E-02 -4. 51018174E-02 -3. 53947973E-02 1. 05268731E-01  
-5. 04942582E-02 2. 52245492E-02 -1. 50431727E-03 -1. 83100800E-02 -2. 14034010E-02  
1. 38871255E-02 -1. 39255194E-02 2. 24951399E-02 -1. 14893554E-01 6. 49631708E-02  
5. 80485593E-02 4. 69695283E-03 7. 31428766E-03 -4. 45433973E-03 7. 64720746E-02  
-5. 82554806E-02 1. 37317632E-02 -4. 20903928E-03 1. 77051293E-02 -1. 15289832E-01  
-4. 75140940E-02 -1. 41492408E-02 -1. 50555810E-02 1. 05841345E-01 -6. 61580261E-02  
1. 91678061E-02 -3. 28892621E-02 3. 34819191E-02 -1. 10869107E-01 -7. 58109364E-02  
-7. 01682887E-02 -3. 17218821E-02 -2. 97987444E-02 -1. 25672478E-02 -1. 36356354E-02  
-5. 55988212E-02 -2. 31850397E-02 4. 21089677E-02 -4. 28842222E+00 4. 85757157E-01  
-2. 41823302E-01 8. 93216702E-01 -2. 04218269E-01 4. 84143036E-02 -3. 07992536E-01  
1. 14441141E-02 -1. 57595780E-01 4. 47434609E+00 -5. 34800225E-01 2. 72847732E-01  
-9. 22656084E-01 2. 26279243E-01 -1. 29674210E-01 4. 43613214E-01 -7. 83688680E-02  
1. 76622061E-02 5. 36697120E-03 5. 58443951E-02 3. 17971608E-02 -5. 73991515E-02  
-3. 79702378E-02 3. 35206807E-02 -2. 46567603E-02 6. 53818710E-02 1. 07399814E-01  
9. 73750932E-02 -1. 03728881E-02 -3. 19504306E-02 -8. 00862415E-02 -2. 68477904E-02  
3. 74325327E-02 3. 37122846E-02 3. 06428643E-02 1. 01961420E-01 -4. 49784697E+00  
6. 58857678E-01 -2. 84564948E-01 1. 02879634E+00 -1. 64241757E-01 3. 90682842E-02  
-4. 56228113E-01 5. 12846676E-02 -1. 73337288E-01 -4. 34946735E-02 -2. 85854341E-02  
1. 16937801E-02 -5. 08374831E-02 -5. 96648421E-03 3. 45567988E-02 4. 67104225E-02  
2. 22719044E-02 1. 05261095E-01 4. 75084688E+00 -7. 08309107E-01 2. 54654304E-01  
-9. 86484398E-01 2. 53491783E-01 -8. 78921051E-02 3. 63365646E-01 -5. 21581649E-02  
-7. 47615746E-03 4. 76309411E-01 -2. 54022647E-01 2. 14235936E-01 2. 34174170E-01  
3. 20919929E-01 -2. 33568600E-01 -1. 74645504E-01 -2. 39157819E-01 5. 28052106E-01  
-3. 35398264E+00 3. 55674164E-01 -1. 49833213E-01 1. 28087478E+00 -3. 27649089E-01  
1. 33229397E-01 -3. 66008945E-01 7. 55255114E-02 -1. 01380316E-01 -9. 18595168E-01  
3. 46035177E-01 -2. 45869686E-01 -1. 81098267E-01 -1. 10696677E+00 3. 84511693E-01  
4. 47823486E-02 2. 63983911E-01 -4. 48201072E-01 3. 85217769E+00 -5. 68937170E-01  
2. 59068717E-01 4. 93746155E-01 8. 33708782E-01 -2. 72178970E-01 -3. 52200296E-02  
-1. 52050290E-01 2. 60130462E-01 -1. 90656833E+00 4. 34247307E-01 -1. 94985869E-01  
3. 07994543E-01 -1. 41978541E-01 6. 29361721E-02 -8. 43463238E-02 1. 94498543E-02  
-8. 16714230E-02 9. 61877707E-02 -1. 10233987E-01 2. 46228092E-02 -8. 23282937E-01  
4. 93436919E-01 -1. 21456825E-01 2. 01538947E-01 -8. 75745620E-02 2. 10678843E-01  
-4. 22620950E-01 7. 80409037E-02 -2. 77058736E-02 4. 71868085E-01 -4. 19819642E-01  
5. 98425424E-02 -1. 15421497E-01 3. 18046879E-02 -3. 23074921E-01 8. 60051859E-01  
5. 09644790E-02 2. 43886569E-02 6. 69819301E-01 -1. 26382811E-02 7. 20948586E-02  
-1. 52732541E-01 4. 57145990E-02 1. 54834445E-01 -8. 23600401E-01 4. 49394782E-02

-4. 12891854E-02 -3. 75831545E-01 -2. 16504523E-01 -3. 90616103E-02 8. 68333030E-02  
-2. 13836661E-02 -3. 04987553E-01 -2. 24880487E-01 5. 11292232E-02 -3. 29824981E-02  
-8. 42127988E-01 4. 00128934E-01 -9. 53373743E-02 1. 57974567E-01 -6. 14847278E-02  
1. 97807598E-01 -3. 57046841E-02 -7. 64640351E-02 3. 28950960E-02 4. 93370362E-01  
-3. 74885075E-01 5. 90073110E-02 -9. 68324980E-02 2. 32801542E-02 -3. 00575306E-01  
1. 22952890E+00 1. 58761708E-01 1. 51444467E-02 7. 29586591E-01 1. 28508156E+00  
1. 24322411E-02 3. 19287429E-01 2. 01788339E-01 1. 51373276E+00 -1. 62074761E-01  
-5. 63042845E-02 1. 05369391E-01 -5. 04952037E-02 -7. 12118645E-02 -3. 01699999E-02  
-8. 20528645E-02 -3. 05168956E-02 -5. 68617808E-02 -1. 03633203E-01 3. 77563773E-03  
2. 73554525E-02 6. 75308849E-02 1. 13819124E-02 -4. 01279123E-02 9. 87581620E-02  
1. 45842954E-01 -8. 42696734E-03 -7. 37674022E-02 -2. 75552800E-02 1. 69052208E-02  
1. 94846637E-02 -1. 26780749E-02 6. 63261590E-02 2. 38164247E-02 -6. 32853608E-02  
-7. 25903477E-02 -8. 07905094E-02 -3. 02225232E-02 2. 96955739E-03 -6. 32571417E-03  
1. 55695558E-01 -3. 07550739E-02 2. 31459572E-02 -3. 43164231E-02 -1. 14617628E-01  
9. 50976492E-02 1. 38613176E-02 4. 29027816E-03 2. 04024537E-02 5. 22768922E-02  
-6. 98818099E-02 -2. 05332461E-02 -6. 36137065E-02 3. 63615492E-02 -8. 88897011E-02  
2. 23384113E-03 2. 37384747E-03 -6. 32117377E-02 -1. 31955578E-02 1. 24836409E-01  
-3. 71043031E-02 1. 29957463E-01 6. 18168221E-02 9. 38806569E-02 2. 06363418E-02  
-8. 49618886E-03 -2. 51432039E-02 -5. 35916304E-02 2. 77456185E-02 -8. 74597827E-02  
1. 53887827E-02 9. 37415638E-02 -6. 96326960E-02 -1. 48384504E-02 2. 64296604E-02  
-2. 71822374E-02 -1. 26926172E-02 -5. 52819398E-02 3. 26011973E-02 -5. 65705019E-02  
1. 18282050E-01 1. 09443464E-01 3. 31870757E-02 -1. 45673769E-02 -1. 22718589E-02  
-9. 43439410E-02 2. 92555601E-02 5. 72876922E-03 1. 95813804E-02 4. 84618371E-02  
9. 93130506E-02 5. 85004944E-03 -1. 89993291E-02 1. 54614325E-02 3. 45263848E-03  
-7. 64908510E-02 6. 15931075E-03 -5. 25215746E-02 -4. 07320544E-02 1. 02743414E-01  
2. 03197569E-02 -3. 32753233E-02 -6. 31794400E-03 4. 16180558E-02 5. 82197416E-02  
6. 01700312E-03 6. 02506018E-02 -7. 59667017E-02 -2. 23465027E-01 5. 41702590E-03  
-6. 27546829E-02 -1. 51202846E-01 -3. 42340914E-01 1. 16763517E-01 -1. 11658688E-01  
1. 08562506E-01 -8. 25507744E-01 -5. 40226314E-01 -3. 04793260E-01 -2. 67454037E-04  
-5. 75180970E-01 -6. 37104261E-01 7. 85387454E-04 -1. 24363585E-01 -1. 21926785E-01  
-3. 67974892E-01 -5. 80077723E-01 1. 09709274E-01 -1. 27928379E-02 4. 10082842E-02  
-3. 72683179E-01 -3. 04794904E-02 -8. 51730075E-03 -1. 25434493E-01 -3. 73591027E-01  
7. 52319655E-02 -2. 28899004E-02 -2. 41408758E-03 -2. 28025992E-02 1. 99938636E-02  
2. 46646469E-02 -2. 38480782E-02 1. 77573078E-02 -9. 92215005E-03 2. 96998980E-02  
-1. 66714128E-02 1. 31592559E-02 -3. 43172418E-02 -7. 59651594E-02 8. 43730272E-02  
-3. 16626246E-03 1. 02299287E-01 2. 46431248E-02 -4. 17385397E-02 1. 17895374E-01  
6. 71347466E-02 6. 21682688E-02 -3. 04433763E-02 -6. 55353230E-02 2. 19543744E-02  
-3. 84695873E-02 1. 25828612E-02 -6. 40418994E-02 -9. 21628480E-02 -7. 42705341E-02  
-3. 91974108E-02 2. 84600327E-02 -2. 97755660E-02 -1. 47463196E-02 -2. 59193490E-02  
1. 61132479E-02 9. 57741723E-02 -1. 57109018E-02 -4. 25399329E-03 -1. 30000292E-02  
2. 71816326E-02 1. 65583820E-02 1. 95104739E-02 -3. 39997747E-02 7. 14400423E-02  
4. 06474657E-02 -4. 40439537E-03 -2. 24793249E-03 -1. 09604450E-02 3. 68409202E-02  
-2. 19427489E-02 5. 97336132E-03 2. 79671827E-02 -1. 55303258E-01 -6. 59196497E-02  
-1. 20913786E-01 -4. 66008164E-02 -1. 66290869E-02 -7. 10500650E-03 -7. 49590502E-04

-5. 64629469E-02 -1. 40832852E-02 3. 50776284E-02 -4. 88324206E-02 1. 34739748E-01  
4. 62841038E-02 4. 88905049E-02 -5. 71154977E-02 -1. 61609762E-02 4. 32084591E-02  
-3. 51190035E-02 3. 42909630E-02 -7. 31295212E-02 2. 59402841E-03 -1. 31970567E-02  
-1. 94613169E-01 1. 26967483E-01 1. 01993181E-01 -2. 47508409E-01 1. 12769353E-01  
-5. 11246217E-02 -1. 49329981E-01 -4. 31430079E-02 4. 52701718E-02 4. 44774409E-02  
-6. 26071215E-02 -7. 15730007E-02 1. 16184157E-01 -8. 95080889E-02 -7. 44297501E-02  
-2. 33475297E-01 3. 06643766E-02 7. 38314940E-03 2. 27283828E-02 -1. 16351287E-01  
-9. 32557184E-03 2. 30682245E-01 -5. 36818396E-02 1. 03382258E-01 -8. 34149764E-02  
-2. 72278845E-02 -3. 85547965E-04 -4. 65512119E-02 -4. 98537196E-02 -1. 49158922E-03  
-1. 14115157E-01 1. 82811904E-02 1. 70492646E-01 1. 37782736E-01 4. 39787334E-02  
-4. 73837882E-02 4. 29100207E-02 2. 52100370E-04 6. 09185101E-02 -2. 05560596E-01  
7. 55032571E-02 4. 31754023E-02 -3. 31570408E-02 -9. 17886958E-02 3. 81432415E-02  
-1. 03651908E-01 4. 81354092E-02 -7. 65601180E-02 5. 53848694E-02 -8. 85936295E-02  
7. 42313981E-03 1. 37800354E-01 4. 11148033E-03 2. 72847073E-02 -1. 04322696E-02  
7. 46088968E-02 -2. 03954954E-02 6. 94118474E-03 -7. 01832141E-03 -1. 10639012E-01  
-8. 65079847E-02 -7. 55201995E-02 -4. 70868089E-02 -2. 98130936E-02 7. 13293378E-03  
6. 68153668E-02 -3. 51952197E-02 7. 29431838E-02 -3. 17065532E-02 8. 41937863E-02  
2. 59354314E-02 1. 06220344E-04 3. 63659912E-02 6. 79497552E-02 3. 55773036E-03  
5. 80436697E-02 -1. 24542207E-02 -1. 15547737E-01 2. 58406984E-02 8. 29396609E-02  
-3. 34944606E-02 1. 38852318E-01 -2. 99483330E-02 6. 26093634E-02 -5. 11020710E-02  
6. 85006885E-02 1. 37072436E-02 3. 03682150E-02 8. 51626859E-02 4. 29267126E-02  
1. 32065042E-01 -2. 47637545E-02 -6. 41507797E-02 6. 34851993E-02 -6. 57947040E-02  
1. 92549554E-02 -1. 65230267E-01 -4. 23251331E-02 3. 01241969E-02 -1. 39257384E-01  
-1. 64656535E+00 -6. 90742905E-01 -2. 14009555E-01 -5. 24796004E-01 -6. 05516742E-01  
1. 44126004E-01 -5. 56373604E-02 -2. 99765583E-02 5. 73219407E-02 1. 00312886E+00  
6. 29521711E-01 1. 33614557E-01 8. 89315781E-01 6. 79123486E-01 -1. 06433031E-01  
-2. 27810658E-02 -1. 00015880E-02 -1. 98374999E-02 -2. 80945502E-01 -2. 02679166E-01  
-1. 81666446E-02 -6. 96592466E-02 1. 24920079E-03 -8. 67106152E-02 9. 68727694E-03  
1. 13433528E-02 1. 26597975E-02 -1. 11296921E-01 -5. 61839848E-03 -4. 12752211E-02  
-2. 71616300E-01 -2. 47614650E-01 -7. 66424457E-02 -8. 77786744E-03 -4. 67946826E-03  
-1. 97358942E-03 1. 76282031E-01 9. 68069062E-03 -7. 94700778E-03 -4. 39786081E-02  
1. 11926923E-01 8. 93347387E-02 7. 50422009E-03 3. 66412480E-03 1. 79619723E-03  
8. 12802617E-02 1. 00379922E-02 8. 02469708E-03 1. 31330548E-02 -5. 65368638E-02  
-7. 43679322E-02 -4. 60337021E-03 -9. 55217215E-03 1. 23754134E-02 1. 30282447E-01  
-6. 29173638E-02 1. 75181053E-02 4. 21301023E-02 1. 80718524E-01 5. 52406993E-02  
7. 96795965E-03 3. 32378392E-04 6. 13511639E-05 -5. 71299006E-02 3. 12623779E-02  
1. 91293299E-02 5. 47053999E-02 9. 43531591E-02 -1. 05541505E-01 -8. 71539001E-03  
-3. 22789708E-03 -2. 44353830E-02 -7. 98534023E-02 1. 17010678E-01 -2. 94568897E-03  
1. 02077452E-01 -7. 73132104E-02 8. 39870628E-02 1. 65199531E-03 1. 22725515E-03  
-1. 09261235E-02 -9. 37098858E-02 3. 68927186E-02 1. 34109186E-03 4. 67083346E-02  
4. 64727436E-02 8. 86263234E-02 2. 14549978E-04 5. 54591127E-03 2. 32868507E-03  
4. 09466361E-02 4. 65843960E-02 5. 47738846E-03 1. 56847668E-02 -1. 02665726E-01  
9. 46442099E-02 5. 87768237E-03 3. 50765653E-03 -2. 95247344E-03 -3. 58466031E-02  
-8. 81739203E-02 2. 65111756E-04 -8. 71196441E-02 -2. 23005032E-02

## References

1. Cheng, Y. J.; Luo, J. D.; Hau, S.; Bale, D. H.; Kim, T. D.; Shi, Z. W.; Lao, D. B.; Tucker, N. M.; Tian, Y. Q.; Dalton, L. R.; Reid, P. J.; Jen, A. K. Y. *Chemistry of Materials* **2007**, *19*, 1154.
2. Zhou, X.-H.; Luo, J.; Davies, J. A.; Huang, S.; Jen, A. K. Y. *Journal of Materials Chemistry* **2012**, *22*, 16390.
3. Gaussian 09, Revision D.01. Frisch, M. J. T., G. W.; Schlegel, H. B.; Scuseria, G. E.; Robb, M. A.; Cheeseman, J. R.; Montgomery, Jr., J. A.; Vreven, T.; Kudin, K. N.; Burant, J. C.; Millam, J. M.; Iyengar, S. S.; Tomasi, J.; Barone, V.; Mennucci, B.; Cossi, M.; Scalmani, G.; Rega, N.; Petersson, G. A.; Nakatsuji, H.; Hada, M.; Ehara, M.; Toyota, K.; Fukuda, R.; Hasegawa, J.; Ishida, M.; Nakajima, T.; Honda, Y.; Kitao, O.; Nakai, H.; Klene, M.; Li, X.; Knox, J. E.; Hratchian, H. P.; Cross, J. B.; Bakken, V.; Adamo, C.; Jaramillo, J.; Gomperts, R.; Stratmann, R. E.; Yazyev, O.; Austin, A. J.; Cammi, R.; Pomelli, C.; Ochterski, J. W.; Ayala, P. Y.; Morokuma, K.; Voth, G. A.; Salvador, P.; Dannenberg, J. J.; Zakrzewski, V. G.; Dapprich, S.; Daniels, A. D.; Strain, M. C.; Farkas, O.; Malick, D. K.; Rabuck, A. D.; Raghavachari, K.; Foresman, J. B.; Ortiz, J. V.; Cui, Q.; Baboul, A. G.; Clifford, S.; Cioslowski, J.; Stefanov, B. B.; Liu, G.; Liashenko, A.; Piskorz, P.; Komaromi, I.; Martin, R. L.; Fox, D. J.; Keith, T.; Al-Laham, M. A.; Peng, C. Y.; Nanayakkara, A.; Challacombe, M.; Gill, P. M. W.; Johnson, B.; Chen, W.; Wong, M. W.; Gonzalez, C.; and Pople, J. A.; Gaussian, Inc., Wallingford CT, 2013.
